# Supplementary material for: Reducing early infant mortality in India: results of a prospective cohort of pregnant women using emergency medical services
Source: PubMed Central journal article supplement — BMJ Open. 2018 Apr 13;8(4):e019937. doi: 10.1136/bmjopen-2017-019937 (PMC5905760; doi:10.1136/bmjopen-2017-019937), 2018-04-13
Supplement: bmjopen-2017-019937.draft_revisions.pdf [file bmjopen-2017-019937.draft_revisions.pdf]

# BMJ Open

BMJ Open is committed to open peer review. As part of this commitment we make the peer review history of every article we publish publicly available.

When an article is published we post the peer reviewers' comments and the authors' responses online. We also post the versions of the paper that were used during peer review. These are the versions that the peer review comments apply to.

The versions of the paper that follow are the versions that were submitted during the peer review process. They are not the versions of record or the final published versions. They should not be cited or distributed as the published version of this manuscript.

BMJ Open is an open access journal and the full, final, typeset and author-corrected version of record of the manuscript is available on our site with no access controls, subscription charges or pay-per-view fees (<http://bmjopen.bmj.com>).

If you have any questions on BMJ Open's open peer review process please email [info.bmjopen@bmj.com](mailto:info.bmjopen@bmj.com)

# BMJ Open

## Reducing early infant mortality in India: results of a prospective cohort of pregnant women utilizing emergency medical services

|                                 |                                                                                                                                                                                                                                                                                                                                                                                                                  |
|---------------------------------|------------------------------------------------------------------------------------------------------------------------------------------------------------------------------------------------------------------------------------------------------------------------------------------------------------------------------------------------------------------------------------------------------------------|
| Journal:                        | <i>BMJ Open</i>                                                                                                                                                                                                                                                                                                                                                                                                  |
| Manuscript ID                   | bmjopen-2017-019937                                                                                                                                                                                                                                                                                                                                                                                              |
| Article Type:                   | Research                                                                                                                                                                                                                                                                                                                                                                                                         |
| Date Submitted by the Author:   | 04-Oct-2017                                                                                                                                                                                                                                                                                                                                                                                                      |
| Complete List of Authors:       | Bills, Corey; University of California San Francisco School of Medicine, Emergency Medicine<br>Newberry, Jennifer; Stanford, Emergency Medicine<br>Darmstadt, G; Stanford University,<br>Pirrota, Elizabeth; Stanford, Emergency Medicine<br>Rao, G.V. Ramana; GVK Emergency Management and Research Institute<br>Mahadevan, S.; Stanford, Emergency Medicine<br>Strehlow, Matthew; Stanford, Emergency Medicine |
| <b>Primary Subject Heading</b>: | Global health                                                                                                                                                                                                                                                                                                                                                                                                    |
| Secondary Subject Heading:      | Paediatrics, Emergency medicine, Epidemiology                                                                                                                                                                                                                                                                                                                                                                    |
| Keywords:                       | ACCIDENT & EMERGENCY MEDICINE, Maternal medicine < OBSTETRICS, India, Emergency Medical Services (EMS), Neonatal Mortality                                                                                                                                                                                                                                                                                       |
|                                 |                                                                                                                                                                                                                                                                                                                                                                                                                  |

SCHOLARONE™  
Manuscripts

only

**Title:** Reducing early infant mortality in India: results of a prospective cohort of pregnant women utilizing emergency medical services

**Authors:**

Corey B. Bills MD MPH (1)\*

Jennifer A. Newberry MD JD (2)

Gary Darmstadt MD MS (3)

Elizabeth A. Pirrotta MS (2)

G.V. Ramana Rao MD (Community Medicine) DPH PGDGM (4)

S.V. Mahadevan MD (3)

Matthew C. Strehlow MD (3)

**Affiliations**

1. University of California, San Francisco, Department of Emergency Medicine, San Francisco, CA
2. Stanford University, Department of Emergency Medicine, Stanford, CA
3. Stanford University, Department of Pediatrics, Stanford, CA
4. GVK Emergency Management and Research Institute, Telangana, India

**\*Corresponding Author:**

Corey B. Bills

Assistant Professor

Department of Emergency Medicine

University of California, San Francisco

1001 Potrero Avenue

San Francisco, CA 94110

Phone: 917-414-8899

E-mail: corey.bills@ucsf.edu

**Word count:** 2718

**Running Title:** Emergency medical services for early infant mortality reduction in India

**Author Contributions:** MCS, EAP, GVRR and SVM contributed to the study design, implementation, data analysis and manuscript production. CBB and JAN contributed to data analysis and manuscript production. GD contributed to manuscript production. CBB, MCS and SVM accept full responsibility for the work and conduct of the study, had access to the data and controlled the decision to publish.

**ABSTRACT**

1  
2  
3 Objectives: This study describes the demographic characteristics and clinical outcomes of  
4 neonates born within 7 days of public ambulance transport to hospitals across five states in India.

5  
6  
7  
8 Design: Prospective observational study.

9  
10 Setting: Five Indian states using a centralised EMS agency that transported 3.1 million pregnant  
11 women in 2014.

12  
13  
14 Participants: Over 6 weeks in 2014, this study followed a convenience sample of 1,431 neonates  
15 born to women utilizing a public-private ambulance service for a 'pregnancy related' problem.

16  
17 Initial calls were deemed 'pregnancy related' if categorised by EMS dispatchers as 'pregnancy',  
18 'childbirth', 'miscarriage' or 'labour pains'. Interfacility transfers, patients absent on ambulance  
19 arrival, refusal of care, and neonates born to women beyond 7 days of using the service were  
20 excluded.  
21  
22  
23  
24  
25  
26  
27

28 Main outcome measures: Emergency medical technician (EMT) interventions and death at 2, 7  
29 and 42 days after delivery.  
30  
31  
32

33 Results: Among 1,684 women, 1,411 gave birth to 1,431 newborns within 7 days of initial  
34 ambulance transport. Median maternal age at delivery was 23 years [inter-quartile range (IQR):  
35 21-25]. Most mothers were from rural/tribal areas (92.5%) and lower social (79.9%) and  
36 economic status (69.9%). Cumulative mortality rates at 2, 7 and 42-days follow-up were 41, 53  
37 and 62 per 1000 births, respectively. Perinatal mortality rate among enrolled cases was 53 per  
38 1000. Preterm birth [odds ratio (OR): 2.89, 95% confidence interval (CI): 1.67-5.00], twin  
39 deliveries (OR: 2.80, 95% CI: 1.10-7.15), and cesarean section (2.21, 95% CI: 1.15-4.23) were  
40 the strongest predictors of mortality.  
41  
42  
43  
44  
45  
46  
47  
48  
49  
50

51 Conclusions: The perinatal mortality rate associated with this poor, marginalized cohort of  
52 patients with high-acuity conditions of pregnancy was nearly two times the most recent rate for  
53  
54  
55  
56  
57  
58  
59  
60

1  
2  
3 India as a whole (28 per 1000 births). Emergency medical services have the potential to reduce  
4  
5 inequities in accessing healthcare and increase facility-based care, thereby reducing young infant  
6  
7 mortality in India.  
8  
9

## 10 11 12 **STRENGTHS AND LIMITATIONS** 13

- 14 • This study is a novel, prospective assessment of perinatal mortality in India whose mothers  
15 utilized prehospital services within 7 days of delivery.  
16
- 17 • Follow-up rates were excellent and cumulative mortality rates at 2, 7 and 42-days follow-up  
18 were 41, 53 and 62 per 1000 births, respectively.  
19
- 20 • Generalisability may be limited as it was a convenience sample of a unique prehospital  
21 system across multiple states in India.  
22
- 23 • Limited data regarding variability and quality of hospital management and therapeutics were  
24 collected  
25  
26  
27  
28  
29  
30  
31  
32  
33  
34  
35  
36  
37  
38  
39  
40

41 **KEYWORDS:** India, Accident and Emergency Medicine, Maternal Medicine—Obstetrics,  
42  
43 Emergency Medical Services (EMS), Neonatal Mortality  
44  
45  
46  
47  
48  
49

## 50 51 **INTRODUCTION** 52 53 54 55 56 57 58 59 60

1  
2  
3 An estimated 2.6 million stillbirths and 2.7 million neonatal deaths occur globally each year.[1]

4  
5 A disproportionate percentage (approximately 99%) of these deaths occur in low and middle-  
6  
7  
8 income countries. [2]  
9

10  
11  
12 India accounts for approximately one-quarter of global newborn deaths, with an estimated  
13  
14 760,000 neonatal deaths in 2012. While India has made laudable progress in reducing overall  
15  
16 child mortality over the past 25 years, similar reductions in neonatal mortality have lagged. As a  
17  
18 result, India fell short of the Millennium Development Goal (MDG-4) of a two-thirds reduction  
19  
20 in under-five mortality from 1990-2015. [3]  
21  
22  
23

24  
25  
26 Globally, the overall number of neonatal deaths has declined significantly, yet they account for  
27  
28 an increasing proportion of under-five deaths.[4,5] Attempts to reduce deaths around the time of  
29  
30 childbirth have been particularly challenging.[6] In 2013, India's perinatal mortality rate (PMR),  
31  
32 or the number of third trimester stillbirths (after 28 weeks gestational age) and neonatal deaths in  
33  
34 the first 7 days, was 28 per 1000 total births.[7]  
35  
36  
37

38  
39  
40 Previous research on evidence-based approaches to reducing neonatal mortality have included  
41  
42 efforts to increase access to preventive and curative antenatal, perinatal and postnatal care.[8] To  
43  
44 date, however, little attention has focused on the quality of pre-hospital care and transport on  
45  
46 neonatal outcomes in developing countries. Pre-hospital care in India has the potential to  
47  
48 increase access to skilled birth attendants and facility-based health services, while also providing  
49  
50 early lifesaving interventions during transport that can reduce overall neonatal mortality. Recent  
51  
52 data from two states in India demonstrate substantial reductions in neonatal and infant mortality  
53  
54  
55  
56  
57  
58  
59  
60

1  
2  
3 rates associated with pre-hospital services.[9] This study describes the demographics,  
4 management and clinical outcomes of young infants born to laboring women in five Indian states  
5 who were transported by an ambulance service with trained emergency medical technicians  
6 (EMTs).  
7  
8  
9  
10  
11  
12  
13

## 14 **METHODS**

15  
16 Over a 6-week period, from February-April 2014, research assistants enrolled a convenience  
17 sample of neonates born to women in their third trimester of pregnancy who called for GVK  
18 Emergency Management and Research Institute (GVK EMRI) ambulance transport for  
19 pregnancy-related complaints. Neonates were enrolled from one of five participating Indian  
20 states: Andhra Pradesh, Assam, Gujarat, Karnataka, and Meghalaya (Figure 1).  
21  
22  
23  
24  
25  
26  
27  
28  
29  
30

## 31 **GVK EMRI**

32  
33 GVK EMRI is a not-for-profit, public-private partnership that provides free ambulance transport  
34 and pre-hospital stabilization care that can be accessed using a three-digit, toll-free phone  
35 number. Launched in 2005, GVK EMRI is currently the largest provider of emergency medical  
36 services in India (and in the world), operating in 17 of 28 Indian states and union territories and  
37 representing a catchment population of 750 million people. Obstetric emergencies comprise the  
38 single largest category of GVK EMRI's pre-hospital transports, with upwards of 30% of all calls  
39 being pregnancy-related, totaling 3.1 million calls for pregnancy-related complaints in 2014.[10]  
40  
41  
42  
43  
44  
45  
46  
47  
48  
49  
50

51 Call management, dispatch, and online medical direction are provided by central state-based,  
52 emergency call centers that support a fleet of ambulances, strategically distributed to optimize  
53  
54  
55  
56  
57  
58  
59  
60

1  
2  
3 response times. Individual ambulance providers are dispatched based on availability and distance  
4  
5 to the patient. EMTs provide basic emergency obstetric and neonatal care, including resuscitation  
6  
7 and administration of life-saving medications, under the oversight of real-time physician-guided  
8  
9 medical direction. Patients are transported to the nearest appropriate public or private care  
10  
11 facility unless they request an alternate facility.  
12  
13

### 14 15 16 17 **Enrollment Process**

18  
19 Patients were enrolled six days a week, Monday through Saturday, during daytime hours for six  
20  
21 hours per day. Any woman in her third trimester of pregnancy who called for a pregnancy-  
22  
23 related complaint was eligible for enrollment. A call was considered “pregnancy-related” if it  
24  
25 was categorized by the dispatch officer as a call for “pregnancy”, “childbirth”, “miscarriage”, or  
26  
27 “labor pains”. Exclusion criteria included calls for inter-facility transfers, patients who were  
28  
29 absent upon EMT arrival, and patients who refused care. Newborns of women callers were  
30  
31 enrolled if born to a mother within seven days of the initial call.  
32  
33  
34  
35  
36  
37

### 38 **Data Collection**

39  
40 EMTs collected demographic, historical and current clinical data related to both maternal and  
41  
42 neonatal care during and after ambulance transport. This information was relayed and  
43  
44 categorized by research assistants via telephone in real time.  
45  
46  
47  
48  
49

50 Neonates were matched to maternal demographic, prenatal characteristics and pre-hospital care.  
51  
52 Demographic data included geography, economic status (defined by maternal possession of the  
53  
54 low-income government health insurance programme white ration card), prior maternal  
55  
56  
57  
58  
59



1  
2  
3 education, and current employment. Social status was classified by maternal self-identified caste;  
4  
5 Lower social classes included 'scheduled caste' (lowest, most socially disadvantaged group),  
6  
7 'scheduled tribe' (socially and geographically disadvantaged), and 'backward caste'  
8  
9 (intermediary group socially). 'Other caste' included refers to those with the highest social  
10  
11 status.  
12  
13  
14  
15  
16  
17

18 Among the subset of neonates delivered either prior to ambulance arrival or in the pre-hospital  
19  
20 setting (under the care of an EMT), direct neonatal clinical care data was also recorded. Newborn  
21  
22 infant gestational age was determined by maternal report often based on last menstrual period.  
23  
24  
25  
26

27 Two separate telephone numbers, the mother's and a friend's or relative's, were collected at the  
28  
29 time of enrollment to facilitate patient follow-up. All patients who delivered prior to emergency  
30  
31 medical services (EMS) arrival through 7 days after the dispatch call, were followed up by phone  
32  
33 at 48 hours, 7 days and 42 days postpartum.[11] The 42-day follow-up period was utilized to  
34  
35 capture maternal mortality as well as young infant outcomes.  
36  
37  
38  
39  
40

41 Per GVK EMRI's standard protocol, all patients were verbally consented by responding EMTs  
42  
43 for treatment, data collection, and follow-up at the time of enrollment. The study was approved  
44  
45 by the Institutional Review Board at Stanford University (IRB#18185) and the Ethics and  
46  
47 Research Committee at GVK EMRI.  
48  
49  
50  
51

## 52 **Data Analysis**

53  
54  
55  
56  
57  
58  
59  
60

1  
2  
3 Initial patient data was recorded securely online using REDCap (Stanford University).[12] All  
4 data analysis was conducted via SAS Enterprise Guide for Windows, V.4.3 (SAS Institute Inc.,  
5 Cary, NC, USA). Both maternal and patient data was cleaned and de-identified for analyses.  
6  
7  
8 Descriptive demographic and maternal clinical data was provided as numbers and percentages  
9  
10 where appropriate. In addition to descriptive data, main outcomes included medical interventions  
11  
12 in the pre-hospital setting and mortality at each stage of follow-up. We were unable to  
13  
14 differentiate stillbirths versus neonatal deaths that occurred on the day of delivery.  
15  
16  
17  
18  
19  
20

21  
22 Wilcoxon rank sum and Chi-square tests were used to compare cases of early infant deaths to  
23  
24 those that survived to 2, 7 and 42 days. Variables analysed included demography, items in the  
25  
26 maternal prenatal and past medical history and in the medical care history in the pre-hospital  
27  
28 setting, and delivery characteristics.  
29  
30  
31  
32

33 A multivariate model was constructed using variables that were significant from the Chi-square  
34  
35 tests. State was not included in initial multivariate models, though it was controlled for in  
36  
37 iterative analysis given the proportional variability in early infant death from state to state. Odds  
38  
39 ratios (ORs) and 95% confidence intervals (CI) were used to assess the association of individual  
40  
41 variables with infant death.  
42  
43  
44  
45  
46

## 47 **RESULTS**

48  
49 A total of 1,411 (83.8%) of the 1,684 women enrolled gave birth to a total of 1,431 newborns  
50  
51 (including 40 twins, 2.8%) within 7 days of calling for ambulance services (Table 1). This  
52  
53 represents approximately 1.7% of all pregnancy-related calls to GVK EMRI across the five states  
54  
55  
56  
57  
58  
59  
60

during the study period.

**Table 1. Demographic and maternal health characteristics among neonates born to mothers using Emergency Medical Services (EMS) in five states in India, February-April, 2014.**

|                                             | N=1431 | %     |
|---------------------------------------------|--------|-------|
| <b>Maternal Demographic Characteristics</b> |        |       |
| Age                                         |        |       |
| Median (Intra-quartile range, IQR)          | 23     | 21-26 |
| 15-19                                       | 70     | 4.9   |
| 20-24                                       | 809    | 56.5  |
| 25-29                                       | 434    | 30.3  |
| 30-34                                       | 92     | 6.4   |
| 35-39                                       | 23     | 1.6   |
| 40-44                                       | 3      | 0.2   |
| State                                       |        |       |
| Andhra Pradesh                              | 381    | 26.6  |
| Assam                                       | 201    | 14.0  |
| Gujarat                                     | 477    | 33.3  |
| Karnataka                                   | 342    | 23.9  |
| Meghalaya                                   | 30     | 2.1   |
| Geographic location                         |        |       |
| Rural/Tribal                                | 1323   | 92.5  |
| Urban                                       | 108    | 7.5   |
| Social status *                             |        |       |
| Backward caste                              | 508    | 35.5  |
| Other caste                                 | 284    | 19.8  |
| Scheduled caste                             | 254    | 17.7  |
| Scheduled tribe                             | 381    | 26.6  |
| Economic Status**                           |        |       |
| Pink ration card                            | 422    | 29.5  |
| White ration card                           | 987    | 69.0  |
| Education level completed                   |        |       |
| None                                        | 528    | 36.9  |
| Primary                                     | 357    | 24.9  |
| Secondary                                   | 381    | 26.6  |
| Intermediate                                | 81     | 5.7   |
| Graduate degree                             | 37     | 2.6   |
| Occupation                                  |        |       |
| Homemaker                                   | 1079   | 75.4  |
| Other                                       | 352    | 24.6  |
| Medical history                             |        |       |
| Anemia                                      | 99     | 6.9   |
| Hypertension                                | 10     | 0.7   |
| Pulmonary disease                           | 4      | 0.3   |
| HIV                                         | 2      | 0.1   |
| Antenatal care visits (ANC)                 |        |       |
| 1-3                                         | 732    | 51.2  |
| >3                                          | 671    | 46.9  |
| ≥1 visit with a physician                   | 1,111  | 77.6  |
| Iron supplementation                        | 1197   | 83.6  |

|                                |     |       |
|--------------------------------|-----|-------|
| Parity                         |     |       |
| Multiparous                    | 818 | 57.2  |
| Nulliparous                    | 613 | 42.8  |
| Age at first pregnancy***      |     |       |
| Median (IQR)                   | 21  | 20-22 |
| 15-19                          | 197 | 24.1  |
| 20-24                          | 550 | 67.2  |
| 25-29                          | 65  | 7.9   |
| 30-34                          | 3   | 0.4   |
| Years since prior pregnancy*** |     |       |
| <2                             | 364 | 44.5  |
| 2-3                            | 211 | 25.8  |
| >3                             | 237 | 29.0  |

\* Self-identified caste is used as a proxy for social status and in India and is often used in national population health level monitoring. Scheduled caste is the lowest, most socially disadvantaged group. 'Scheduled tribe' is also a disadvantaged group. 'Backward caste' is an intermediary group socially; and 'other caste' includes all those who do not belong to the aforementioned group and have the highest social status.

\*\* Economic status is defined by whether patients were dependent on the low-income government health insurance program (white ration card).

\*\*\*Of multiparous mothers only (n=818).

Most neonates were born to mothers from rural or tribal areas (n=1,323, 92.5%), lower economic status (n=987, 69.0%) and lower social class (n=1,143, 79.9%); and the majority had less than a secondary education (n=885, 61.8%).

At the time of initial ambulance call, 82.5% (n=1,180) of women were term gestation (37-42 weeks), 97.2% (n=1391) reported contractions or abdominal pain, 31.0% (n=443) had rupture of membranes (ROM) with contractions and 7.9% (n=113) had vaginal bleeding (Table 2).

**Table 2. Characteristics of neonates peri-EMS transport in five states in India, February-April, 2014**

|                                      | N=1431 | %         |
|--------------------------------------|--------|-----------|
| <b>Prehospital Characteristics</b>   |        |           |
| Gestational age (weeks) at transport |        |           |
| Median (IQR)                         | 39.7   | 38.4-40.0 |

|    |                                                         |      |       |
|----|---------------------------------------------------------|------|-------|
| 1  |                                                         |      |       |
| 2  |                                                         |      |       |
| 3  | <32                                                     | 32   | 2.2   |
| 4  | 32-36                                                   | 164  | 11.5  |
| 5  | 37-42                                                   | 1180 | 82.5  |
| 6  | >42                                                     | 38   | 2.7   |
| 7  |                                                         |      |       |
| 8  | Receiving hospital type                                 |      |       |
| 9  | Government                                              | 1181 | 79.7  |
| 10 | Private/Paid                                            | 187  | 13.2  |
| 11 | Trust/NGO                                               | 50   | 3.5   |
| 12 | Distance from scene to facility (km)                    | 15   | 9-23  |
| 13 | Time from call to facility (min)                        | 65   | 50-84 |
| 14 | Presentation                                            |      |       |
| 15 | Contractions                                            | 1391 | 97.2  |
| 16 | Rupture of membranes                                    | 443  | 31.0  |
| 17 | Vaginal bleeding                                        | 113  | 7.9   |
| 18 | Abnormal maternal vital recorded                        | 301  | 22.1  |
| 19 | HR $\geq$ 100                                           | 112  | 7.8   |
| 20 | SBP <90                                                 | 16   | 1.2   |
| 21 | SBP $\geq$ 140 AND <160 or DBP $\geq$ 90 AND <110       | 192  | 13.4  |
| 22 | SBP $\geq$ 160 or DBP $\geq$ 110                        | 20   | 1.4   |
| 23 | RR $\geq$ 30                                            | 1    | 0.1   |
| 24 |                                                         |      |       |
| 25 | Emergency Medical Technician (EMT) actions              |      |       |
| 26 | Left lateral positioning                                | 1364 | 95.3  |
| 27 | Oxygen provided                                         | 331  | 23.1  |
| 28 | IV placed                                               | 165  | 11.5  |
| 29 |                                                         |      |       |
| 30 | <b>Delivery Characteristics</b>                         |      |       |
| 31 | When delivered                                          |      |       |
| 32 | Prior to ambulance arrival                              | 37   | 2.6   |
| 33 | After ambulance arrival and prior to hospital admission | 45   | 3.1   |
| 34 | Within 48 hours                                         | 1285 | 89.8  |
| 35 | Within 7 days                                           | 64   | 4.5   |
| 36 | In-hospital                                             | 1274 | 89.1  |
| 37 | Term (>37 week gestation)                               | 1223 | 85.5  |
| 38 | Vaginal                                                 | 1170 | 81.8  |
| 39 | Twin                                                    | 40   | 2.80  |
| 40 |                                                         |      |       |
| 41 |                                                         |      |       |
| 42 |                                                         |      |       |
| 43 |                                                         |      |       |
| 44 |                                                         |      |       |
| 45 |                                                         |      |       |
| 46 |                                                         |      |       |
| 47 |                                                         |      |       |
| 48 |                                                         |      |       |
| 49 |                                                         |      |       |
| 50 |                                                         |      |       |
| 51 |                                                         |      |       |
| 52 |                                                         |      |       |
| 53 |                                                         |      |       |
| 54 |                                                         |      |       |
| 55 |                                                         |      |       |
| 56 |                                                         |      |       |
| 57 |                                                         |      |       |
| 58 |                                                         |      |       |
| 59 |                                                         |      |       |
| 60 |                                                         |      |       |

1  
2  
3 Abnormal pre-hospital vital signs (pulse rate >99, respiratory rate >29, systolic blood  
4 pressure <90 or >140, or diastolic blood pressure >90) were documented in 22.1% (n=301) of  
5 women. Of those women with tachycardia (n=112), 89.3% (n=100) were placed in the left lateral  
6 position and 10.7% (n=12) received intravenous (IV) fluids. Among those women with  
7 documented hypotension (n=16) 75.0% (n=12) were placed in the left lateral position, and 37.5%  
8 (n=6) received intravenous (IV) fluids. In sum, four women died during this study, and all within  
9 48 hours after hospital arrival.

10  
11  
12 Prior to hospital admission, 82 (5.7%) neonates were delivered from 80 distinct mothers. Thirty-  
13 seven delivered prior to ambulance arrival. EMTs assisted in the delivery of 45 neonates, either  
14 on scene (where the ambulance picked up the patient), during transport or immediately on  
15 hospital arrival. Another 1,349 (94.3%) deliveries occurred after EMS transport, with the  
16 majority (n=1,285, 89.8%) occurring within 2 days of EMS dispatch. Of the deliveries that  
17 followed EMS transport, 1,274 (94.4%) occurred in the hospital and another 74 (5.5%) followed  
18 hospital discharge.

19  
20  
21 The median distance from the scene to the hospital was 15 km [Inter-quartile range (IQR): 9-23].

22  
23  
24 The median time from initial call to hospital arrival was 65 minutes (IQR: 50-84).

25  
26  
27 The overall follow-up rates at 2, 7 and 42 days were 99.8%, 99.3% and 94.1%, respectively. In  
28 sum, 62 died by day 2, 76 neonates had died by day 7 and a total of 84 young infants had  
29 perished by day 42 (Table 3). Cumulative mortality rates were 53 and 62 per 1000 births at 7 and  
30 42-day follow-up, respectively. The calculated PMR was 53 deaths per 1000 births. The highest  
31  
32  
33  
34  
35  
36  
37  
38  
39  
40  
41  
42  
43  
44  
45  
46  
47  
48  
49  
50  
51  
52  
53  
54  
55  
56  
57  
58  
59  
60

7-day mortality rate was in the state of Meghalaya (200 per 1000,  $p=0.019$ ). Other demographic indicators, including economic, social (caste status), education or occupational status of the mother were not significantly related to mortality in univariate analysis.

**Table 3. Characteristics and factors associated with perinatal mortality in five states in India, February-April, 2014.**

|                                             | Alive  |      | Dead |      | P-value      |
|---------------------------------------------|--------|------|------|------|--------------|
|                                             | N=1345 | %    | N=76 | %    |              |
| <b>Maternal Demographic Characteristics</b> |        |      |      |      |              |
| Rural or tribal geography                   | 1243   | 92.4 | 72   | 94.7 | 0.652        |
| Gujarat state                               | 444    | 33.0 | 31   | 40.8 | 0.162        |
| Meghalaya state                             | 25     | 1.9  | 5    | 6.6  | <b>0.019</b> |
| <b>Social status</b>                        |        |      |      |      |              |
| Other caste                                 | 270    | 20.1 | 12   | 15.8 | 0.356        |
| Non-other caste                             | 1071   | 79.6 | 64   | 84.2 |              |
| <b>Economic status</b>                      |        |      |      |      |              |
| Pink ration card                            | 396    | 29.4 | 24   | 31.6 | 0.639        |
| White ration card                           | 930    | 69.1 | 50   | 65.8 |              |
| <b>Education level</b>                      |        |      |      |      |              |
| No prior schooling                          | 489    | 36.4 | 32   | 42.1 | 0.332        |
| Attended school                             | 811    | 60.3 | 42   | 55.3 |              |
| Homemaker                                   | 1014   | 75.4 | 59   | 77.6 | 0.658        |
| ≥2 years since prior delivery               | 423    | 31.4 | 23   | 30.3 | 0.802        |
| <b>Maternal Prenatal Characteristics</b>    |        |      |      |      |              |
| Prenatal iron supplementation               | 1129   | 83.9 | 60   | 78.9 | 0.248        |
| ≥1 visit with a physician                   | 1046   | 77.8 | 57   | 75.0 | 0.532        |
| <4 ANC visits                               | 677    | 50.3 | 49   | 64.5 | <b>0.019</b> |
| <b>Current Maternal and Neonatal Care</b>   |        |      |      |      |              |
| Any abnormal maternal vital sign            | 264    | 19.6 | 27   | 35.5 | <b>0.019</b> |
| C-section                                   | 107    | 8.0  | 13   | 17.1 | <b>0.005</b> |
| Delivery prior to hospital admission        | 73     | 5.4  | 6    | 7.9  | 0.361        |
| In-hospital                                 | 1197   | 89.0 | 68   | 89.5 | 0.911        |
| IV placed in mother                         | 148    | 11.0 | 13   | 17.1 | 0.103        |
| Maternal tachycardia (HR≥100)               | 102    | 7.6  | 10   | 13.2 | 0.081        |
| Left lateral position during transport      | 1287   | 95.7 | 69   | 90.8 | <b>0.047</b> |
| Premature rupture of membranes              | 62     | 4.6  | 8    | 10.5 | <b>0.021</b> |
| Preterm (<37 weeks)                         | 167    | 12.4 | 18   | 23.7 | <b>0.005</b> |
| Twin                                        | 33     | 2.5  | 7    | 9.2  | <b>0.001</b> |

1  
2  
3 Univariate analysis among all mothers identified the following maternal risk factors for elevated  
4 neonatal mortality at 7 days: less than four antenatal care (ANC) visits ( $p=0.019$ ), abnormal vital  
5 signs ( $p=0.049$ ), IV placement ( $p=0.007$ ) and mother not placed in left lateral position during  
6 transport ( $p=0.047$ ). Of those infants delivered in the presence of pre-hospital care providers, the  
7 cumulative mortality rate at 42 days was 122 per 1000 ( $n=5$ ) with 4 infants lost to follow-up.  
8  
9

10  
11  
12  
13  
14  
15  
16  
17 The association between maternal and infant characteristics and death at 7 and 42-day follow-up  
18 was also assessed through multivariate logistic regression (Table 4). At 42-day follow-up,  
19 preterm birth (OR = 2.89, 95% CI = 1.67-5.00) and twin deliveries (OR = 2.80, 95% CI = 1.10-  
20 7.15) were the strongest predictors of mortality. Other maternal risk factors raising the likelihood  
21 of young infant death included not being placed in the left lateral position en-route to the hospital  
22 (OR = 2.44, 95% CI = 1.06-5.61), heart rate greater than 100 (OR = 2.21, 95% CI = 1.13-4.35),  
23 or having a caesarean section delivery (OR = 2.21, 95% CI = 1.15-4.23). The risk of death was  
24 nearly two-fold higher for young infants born to mothers who went to fewer than four ANC  
25 visits (OR = 1.89, 95% CI = 1.14-3.14).  
26  
27  
28  
29  
30  
31  
32  
33  
34  
35  
36  
37  
38  
39

40 Controlling for geographic (state-to-state) variability led to some changes in the multivariate  
41 regression model for 42-day mortality. Prematurity (OR = 3.08, 95% CI = 1.77-5.35), twin  
42 delivery (OR = 2.79, 95% CI = 1.07-7.23), fewer than four ANC visits (OR = 1.72, 95% CI =  
43 1.03-5.89), and caesarean section delivery (OR = 2.20, 95% CI = 1.09-4.45) continued to be  
44 independent predictors of overall young infant mortality, while maternal tachycardia (OR = 1.76,  
45 95% CI = 0.86-3.62) and maternal positioning (OR = 2.05, 95% CI = 0.87-4.85) were no longer  
46 statistically significant.  
47  
48  
49  
50  
51  
52  
53  
54  
55  
56  
57  
58  
59  
60



**Table 4. Predictors of young infant mortality at 7- and 42-day follow-up by multivariate logistic regression models**

|                                      | 7 Days |           | 42 Days |           |
|--------------------------------------|--------|-----------|---------|-----------|
|                                      | OR     | 95 % CI   | OR      | 95 % CI   |
| Prematurity (<37 weeks)              | 2.21   | 1.19-4.09 | 2.89    | 1.67-5.00 |
| Twin delivery                        | 3.87   | 1.56-9.64 | 2.80    | 1.10-7.15 |
| C-section                            | 1.93   | 0.92-4.03 | 2.21    | 1.15-4.23 |
| <4 ANC visits                        | 1.76   | 1.02-3.02 | 1.89    | 1.14-3.14 |
| Not placed in left lateral position* | 1.67   | 0.62-4.46 | 2.44    | 1.06-5.61 |
| Maternal HR $\geq$ 100*              | 1.57   | 0.70-3.52 | 2.21    | 1.13-4.35 |

\*When controlled by state these variables were no longer statistically significant.

## DISCUSSION

### Reducing the equity gap

Elevated neonatal mortality has been shown globally to be associated with various forms of marginalisation, including poverty, low maternal education, and low social standing.[13]

Previous programs to reduce neonatal mortality have focused on reducing the equity gap—reaching women and newborn infants in greatest need and those with limited access to formal healthcare services.[14-16] This prospective study suggests EMS plays an important, but under-appreciated role in reducing the equity gap and adds to prior data supporting the the role of centralized EMS services in maternal and neonatal health policy.[9] Pre-hospital interventions and rapid transport when coupled with current data on known community and hospital-based risks has the potential to lead to development of interventions aimed at further reducing neonatal deaths.[17-19]

Ambulance services cared for a population—93% from lower social or economic strata—that historically has had less timely access to formal medical services. EMTs performed essential pre-hospital services, including assisting with the delivery of newborns in the field and during transport to the hospital. In 94% of all transports, EMTs connected women and neonates to

1  
2  
3 health facilities offering obstetric care in less than two hours.  
4  
5

6 The absence of an association between mortality and social determinants of health, such as  
7 socioeconomic status or education level, was unexpected. However, the overwhelmingly high  
8 number of neonates from lower socioeconomic classes in our study cohort decreased our ability  
9 to detect the impact of these demographic characteristics on mortality. Furthermore, the impact  
10 of socioeconomic status on neonatal mortality may be very closely linked to the lack of access to  
11 care customary to these populations. In our study, this link did not exist, as EMS overcome many  
12 factors limited healthcare access for poor and marginalized populations; thus, access to care was  
13 broadly provided for all populations by the responding EMTs and subsequent ambulance  
14 transport. This suggests that delivery of EMS may be an important means to achieving greater  
15 equity in healthcare delivery.  
16  
17  
18  
19  
20  
21  
22  
23  
24  
25  
26  
27  
28  
29

### 30 **Quality of Pre-hospital Care**

31 Deficits in the quality of India's pre-hospital care of pregnant women persist. Maternal  
32 haemodynamic instability has significant risks for neonatal health,[20,21] and subsequent  
33 maternal resuscitation, whether through positioning or administration of fluids, has been shown  
34 to increase cardiac output and stroke volume—effectively improving maternal and, by-proxy,  
35 neonatal haemodynamics.[22,23] Continued training aimed at EMT recognition of high-risk  
36 patients and treatment with simple interventions based on vital signs abnormalities is imperative.  
37 Ongoing quality assurance and training efforts are now aimed at increasing EMT recognition of  
38 high-risk patients, rates of fluid resuscitation and proper positioning during pre-hospital maternal  
39 resuscitation.  
40  
41  
42  
43  
44  
45  
46  
47  
48  
49  
50  
51  
52  
53  
54  
55

### 56 **Helping a high-risk population**

1  
2  
3 In developing countries, most perinatal deaths occur at home.[24] Estimates suggest that  
4 transitioning to institutional deliveries with a skilled birth attendant in lieu of traditional home  
5 deliveries could prevent over 500,000 stillbirths and 1.3 million annual neonatal deaths by  
6  
7  
8  
9  
10 2020.[25,26] Yet, even with transport to healthcare facilities, the estimated PMR of 53 deaths per  
11  
12 1000 births is nearly double the reported PMR for all of India of 28 per 1000 births.[27]  
13  
14

15  
16  
17 This discrepancy in PMR rates is likely multifactorial. Prematurity (based on maternal report of  
18 gestational age) was found to be one of the strongest predictors of death. This relationship is  
19  
20  
21 consistent with global data identifying this as the number one cause of neonatal death.[28]  
22

23 Moreover, many deaths in preterm infants occur early in the neonatal period, and rapid  
24  
25 intervention, made possible through transport under the care of an EMT to health care facilities  
26  
27  
28 with the capabilities to provide neonatal intensive care is critically important for survival.  
29

30  
31  
32  
33 The natural twinning rate in the study was 14.0 per 1,000 births, almost double the estimated 7.2  
34  
35 per 1,000 births reported across India.[29] Twin births were a significant predictor of death in  
36  
37  
38 this study (OR 2.8) and thus another important factor in the increased PMR.  
39

40  
41  
42 The relationship between initial maternal hemodynamic instability and mortality of their infants  
43  
44 suggests that the level of acuity of our maternal cohort was high. Women may not recognize the  
45  
46  
47 need to seek emergent care and are calling EMS only when they are in a very critical condition.  
48  
49

50  
51 Finally, almost half (47.4%) of women enrolled in our study attended less than the recommended  
52  
53  
54 four ANC visits, a factor which proved to also be an important predictor of young infant  
55  
56  
57  
58  
59  
60

1  
2  
3 mortality in this study. These women may have had complications that went unrecognized in the  
4  
5 perinatal period and that presented as emergencies necessitating the use of EMS.  
6  
7  
8  
9

10 Notably, the PMR associated with this cohort of patients was significantly higher than the state  
11  
12 averages and associated with risk factors that, when addressed in future efforts, will be important  
13  
14 in reducing neonatal mortality. In this study, however, we were unable to link records from care  
15  
16 pre-hospital care with those for hospital-based care, and thus we cannot comment on the  
17  
18 relationship between mortality and variability in post-transport facility-based care in India,  
19  
20 including treatments, disease course and cause of death in hospital.  
21  
22  
23  
24  
25

26 Emergency response services have the potential to promote equity in access to healthcare  
27  
28 services, and improve perinatal survival in India. The elevated PMR in this large patient cohort is  
29  
30 reflective of the high-risk nature of this population and the need for further attention to coverage  
31  
32 of these services, provision of high-quality tailored interventions and focused investigations to  
33  
34 inform continuous improvement in EMS.  
35  
36  
37  
38  
39

#### 40 **Acknowledgments**

41  
42 We are grateful to the following for support in data collection and quality: Rajini Danthala,  
43  
44 Aruna Gimkala, Divya Patel, Royal Uddin Ahmed, Steffy Christian, Eranna Gowda,  
45  
46 Chandrashekhraswamy Kendadmth, Marada Lakshmana Rao, Rupjoy Maibangsa, Shylaja  
47  
48 Muniyappa, Isberth Tham, and Sahyadri Venkateshappa and Aditya Mantha.  
49  
50  
51  
52  
53

54 **Conflict of Interest:** None exist.  
55  
56  
57  
58  
59  
60

1  
2  
3  
4  
5 **Funding:** This research received no specific grant from any funding agency in the public,  
6 commercial or not-for-profit sectors  
7  
8  
9  
10

11 **Data Sharing:** Technical appendix, statistical code, and dataset available from the Dryad  
12 repository, DOI: [pending]. Full data set available upon request from the corresponding author  
13 at [corey.bills@ucsf.edu](mailto:corey.bills@ucsf.edu).  
14  
15  
16  
17  
18  
19  
20  
21  
22  
23  
24  
25  
26  
27  
28  
29  
30  
31  
32  
33  
34  
35  
36  
37  
38  
39  
40  
41  
42  
43  
44  
45  
46  
47  
48  
49  
50  
51  
52  
53  
54  
55  
56  
57  
58  
59  
60

## References

1. UNICEF. UNICEF Data: Monitoring the Situation of Children and Women.  
<http://data.unicef.org/child-mortality/neonatal.html>. Accessed June 24, 2016.
2. World Health Organization (WHO). The Partnership for Maternal, Newborn and Child Health. [http://www.who.int/pmnch/media/press\\_materials/fs/fs\\_newborndeath\\_illness/en/](http://www.who.int/pmnch/media/press_materials/fs/fs_newborndeath_illness/en/)  
Accessed February 4, 2016.
3. NIMS, ICMR and UNICEF. Infant and Child Mortality in India: Levels, Trends and Determinants, National Institute of Medical Statistics (NIMS), Indian Council of Medical Research (ICMR) and UNICEF India Country Office, New Delhi, India, 2012.  
[http://unicef.in/CkEditor/ck\\_Uploaded\\_Images/img\\_1365.pdf](http://unicef.in/CkEditor/ck_Uploaded_Images/img_1365.pdf). Accessed November 8, 2015.
4. Shiffman J. Issue attention in global health: the case of newborn survival. *Lancet*. 2010; 375: 2045–2049.
5. Black RE, Cousens S, Johnson HL, et al. Global, regional, and national causes of child mortality in 2008: a systematic analysis. *Lancet*. 2010;375:1969–1987.
6. Lawn JE, Blencowe H, Oza S, et al. Progress, priorities, and potential beyond survival. *Lancet*. 2014;384(9938):189–205.
7. Registrar General of India. Sample Registration System (SRS) statistical report 2012. New Delhi: 2013.  
[http://www.censusindia.gov.in/vital\\_statistics/SRS\\_Report\\_2012/2\\_At\\_a\\_glance\\_2012.pdf](http://www.censusindia.gov.in/vital_statistics/SRS_Report_2012/2_At_a_glance_2012.pdf)
8. Koblinsky M, Matthews Z, Hussein J, et al. Lancet Maternal Survival Series steering group. Going to scale with professional skilled care. *Lancet*. 2006; 368(9544):1377-86.

- 1  
2  
3 9. Babiarz KS, Swaminatha MV, Divi N, et al. Ambulance service associated with reduced  
4 probabilities of neonatal and infant mortality in two Indian states. *Health Affairs*. 2016;  
5  
6 35(10):1774-1782.  
7  
8
- 9  
10 10. GVK Emergency Management Research Institute. National Daily Report, 2014. [Internal  
11 Report]. 2014.  
12  
13
- 14 11. Strehlow MC, Newberry JA, Bills CB, et al. Characteristics and outcomes of women using  
15 emergency medical services for third-trimester pregnancy-related problems in India: a  
16 prospective observational study. *BMJ Open*. 2016; 6:7.  
17  
18
- 19 12. Harris P, Taylor R, Thielke R, Payne J, Gonzalez N, Conde J. Research electronic data  
20 capture (REDCap) - A metadata-driven methodology and workflow process for providing  
21 translational research informatics support. *J Biomed Inform*. 2009;42(2):377-81.  
22  
23
- 24 13. Matthews Z, Channon A, Neal S, Osrin D, Madise N, Stones W. Examining the "urban  
25 advantage" in maternal health care in developing countries. *PLoS Med*. 2010;7(9).  
26  
27
- 28 14. Victora CG, Barros AJ, Axelson H, et al. How changes in coverage affect equity in maternal  
29 and child health interventions in 35 Countdown to 2015 countries: an analysis of national  
30 surveys. *Lancet*. 2012;380:1149-56.  
31  
32
- 33 15. Mittal K, Gupta V, Khanna P, Kaushik JS, Sharma A. Evaluation of Integrated Management  
34 of Neonatal and Childhood Illness (IMNCI) algorithm for diagnosis and referral in under-five  
35 children. *Indian J Pediatr*. 2014;81(8):797-9.  
36  
37
- 38 16. Lassi ZS, Haider BA, Bhutta ZA. Community-based intervention packages for reducing  
39 maternal and neonatal morbidity and mortality and improving neonatal outcomes. *Cochrane*  
40 Database Syst Rev 2010;11: CD007754.  
41  
42  
43  
44  
45  
46  
47  
48  
49  
50  
51  
52  
53  
54  
55  
56  
57  
58  
59  
60

17. Darmstadt GL, Bhutta ZA, Cousens S, Adam T, Walker N, et al. Evidence-based, cost-effective interventions: how many newborn babies can we save? *Lancet*. 2005;18;365(9463):977-88.
18. Knippenberg R, Lawn JE, Darmstadt GL, et al. Systematic scaling up of neonatal care in countries. *Lancet*. 2005;365:1087–1098.
19. Martines J, Paul VK, Bhutta ZA, et al. Neonatal survival: a call for action. *Lancet*. 2005; 365: 1189–1197.
20. Grivell RM, Alfirevic Z, Gyte GM, Devane D. Antenatal cardiotocography for fetal assessment. *Cochrane Database Syst Rev*. 2015; Sep 12;9.
21. Devane D, Lalor JG, Daly S, McGuire W, Smith V. Cardiotocography versus intermittent auscultation of fetal heart on admission to labour ward for assessment of fetal wellbeing. *Cochrane Database Syst Rev*. 2012; Feb 15;2.
22. Fujitani S, Baldisseri MR. Hemodynamic assessment in a pregnant and peripartum patient. *Crit Care Med*. 2005;33(10) Suppl:S354–S361.
23. Clark SL, Cotton DB, Pivarnik JM, Lee W, Hankins GD, Benedetti TJ, et al. Position change and central hemodynamic profile during normal third-trimester pregnancy and postpartum. *Am J Obstet Gynecol*. 1991;164(3):883–887.
24. Ensor T, Cooper S. Overcoming barriers to health service access: influencing the demand side. *Health Policy and Planning* 2004; 19:69–79.
25. Campbell OMR, Graham WJ, on behalf of The Lancet Maternal Survival Series steering group. Strategies for reducing maternal mortality: getting on with what works. *Lancet*. 2006; 368:1284–99.



- 1  
2  
3 26. Bhutta ZA, Das JK, Bahl R, et al. Can available interventions end preventable deaths in  
4  
5 mothers, newborn babies, and stillbirths, and at what cost? Lancet. 2014; 384(9940):347-70.  
6  
7  
8 27. SRS 2012 SRS Statistical Report 2012. Government of India: Ministry of Home Affairs,  
9  
10 Office of the Registrar General and Census Commissioner, India.  
11  
12 [http://www.censusindia.gov.in/vital\\_statistics/SRS\\_Reports\\_2012.html](http://www.censusindia.gov.in/vital_statistics/SRS_Reports_2012.html). Accessed January  
13  
14 22, 2016  
15  
16  
17 28. Lawn JE, Blencowe H, Oza S, et al. Progress, priorities, and potential beyond survival.  
18  
19 Lancet. 2014;384(9938):189–205.  
20  
21  
22 29. Smits J, Monden C. Twinning across the Developing World. PLOS One. 2011; 6(9): e2523.  
23  
24  
25  
26  
27  
28  
29  
30  
31  
32  
33  
34  
35  
36  
37  
38  
39  
40  
41  
42  
43  
44  
45  
46  
47  
48  
49  
50  
51  
52  
53  
54  
55  
56  
57  
58  
59  
60

Figure 1. Availability of GVK Emergency Management and Research Institute (EMRI) services and study enrollment by Indian state.

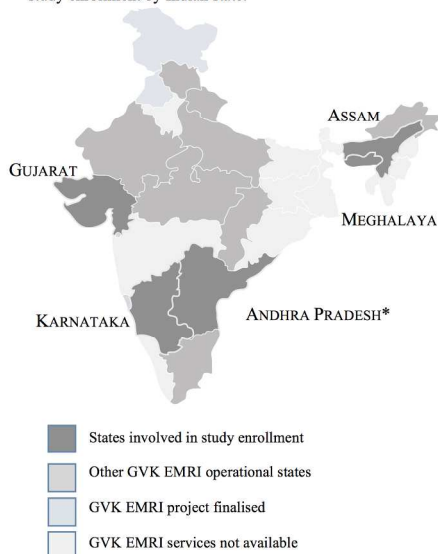

\*After the study's conclusion Andhra Pradesh was partitioned into two separate states: Telengana and Andhra Pradesh

215x279mm (300 x 300 DPI)

# BMJ Open

## Reducing early infant mortality in India: results of a prospective cohort of pregnant women utilizing emergency medical services

|                                 |                                                                                                                                                                                                                                                                                                                                                                                                                  |
|---------------------------------|------------------------------------------------------------------------------------------------------------------------------------------------------------------------------------------------------------------------------------------------------------------------------------------------------------------------------------------------------------------------------------------------------------------|
| Journal:                        | <i>BMJ Open</i>                                                                                                                                                                                                                                                                                                                                                                                                  |
| Manuscript ID                   | bmjopen-2017-019937.R1                                                                                                                                                                                                                                                                                                                                                                                           |
| Article Type:                   | Research                                                                                                                                                                                                                                                                                                                                                                                                         |
| Date Submitted by the Author:   | 11-Jan-2018                                                                                                                                                                                                                                                                                                                                                                                                      |
| Complete List of Authors:       | Bills, Corey; University of California San Francisco School of Medicine, Emergency Medicine<br>Newberry, Jennifer; Stanford, Emergency Medicine<br>Darmstadt, G; Stanford University,<br>Pirrota, Elizabeth; Stanford, Emergency Medicine<br>Rao, G.V. Ramana; GVK Emergency Management and Research Institute<br>Mahadevan, S.; Stanford, Emergency Medicine<br>Strehlow, Matthew; Stanford, Emergency Medicine |
| <b>Primary Subject Heading</b>: | Global health                                                                                                                                                                                                                                                                                                                                                                                                    |
| Secondary Subject Heading:      | Paediatrics, Emergency medicine, Epidemiology                                                                                                                                                                                                                                                                                                                                                                    |
| Keywords:                       | ACCIDENT & EMERGENCY MEDICINE, Maternal medicine < OBSTETRICS, India, Emergency Medical Services (EMS), Neonatal Mortality                                                                                                                                                                                                                                                                                       |
|                                 |                                                                                                                                                                                                                                                                                                                                                                                                                  |

SCHOLARONE™  
Manuscripts

only

1  
2  
3 1 **Title:** Reducing early infant mortality in India: results of a prospective cohort of pregnant  
4 2 women utilizing emergency medical services  
5 3

6 3  
7 4 **Authors:**

8 5 Corey B. Bills MD MPH (1)\*

9 6 Jennifer A. Newberry MD JD (2)

10 7 Gary Darmstadt MD MS (3)

11 8 Elizabeth A. Pirrotta MS (2)

12 9 G.V. Ramana Rao MD (Community Medicine) DPH PGDGM (4)

13 10 S.V. Mahadevan MD (3)

14 11 Matthew C. Strehlow MD (3)  
15 12

16 12  
17 13 **Affiliations**

18 14 1. University of California, San Francisco, Department of Emergency Medicine, San  
19 15 Francisco, CA

20 16 2. Stanford University, Department of Emergency Medicine, Stanford, CA

21 17 3. Stanford University, Department of Pediatrics, Stanford, CA

22 18 4. GVK Emergency Management and Research Institute, Telangana, India  
23 19

24 19  
25 20 **\*Corresponding Author:**

26 21 Corey B. Bills

27 22 Assistant Professor

28 23 Department of Emergency Medicine

29 24 University of California, San Francisco

30 25 1001 Potrero Avenue

31 26 San Francisco, CA 94110

32 27 Phone: 917-414-8899

33 28 E-mail: corey.bills@ucsf.edu  
34 29  
35 29  
36 30

37 30 **Running Title:** Emergency medical services for early infant mortality reduction in India  
38 31  
39 32

40 31 **Author Contributions:** MCS, EAP, GVRR and SVM contributed to the study design,  
41 32

42 32 implementation, data analysis and manuscript production. CBB and JAN contributed to data  
43 33

44 33 analysis and manuscript production. GD contributed to manuscript production. CBB, MCS and  
45 34

46 34 SVM accept full responsibility for the work and conduct of the study, had access to the data and  
47 35

48 35 controlled the decision to publish.  
49 36  
50 36  
51 37

52 36  
53 37 **ABSTRACT**  
54 38  
55 39  
56 40  
57 41  
58 42  
59 43  
60 44

1 Objectives: To describe the demographic characteristics and clinical outcomes of neonates born  
2 within 7 days of public ambulance transport to hospitals across five states in India.

3 Design: Prospective observational study.

4 Setting: Five Indian states using a centralised EMS agency that transported 3.1 million pregnant  
5 women in 2014.

6 Participants: Over 6 weeks in 2014, this study followed a convenience sample of 1,431 neonates  
7 born to women utilizing a public-private ambulance service for a 'pregnancy related' problem.

8 Initial calls were deemed 'pregnancy related' if categorised by EMS dispatchers as 'pregnancy',  
9 'childbirth', 'miscarriage' or 'labour pains'. Interfacility transfers, patients absent on ambulance  
10 arrival, refusal of care, and neonates born to women beyond 7 days of using the service were  
11 excluded.

12 Main outcome measures: Death at 2, 7 and 42 days after delivery.

13 Results: Among 1,684 women, 1,411 gave birth to 1,431 newborns within 7 days of initial  
14 ambulance transport. Median maternal age at delivery was 23 years (IQR: 21-25). Most mothers  
15 were from rural/tribal areas (92.5%) and lower social (79.9%) and economic status (69.9%).

16 Follow-up rates at 2, 7 and 42 days were 99.8%, 99.3% and 94.1%, respectively. Cumulative  
17 mortality rates at 2, 7 and 42-days follow-up were 41, 53 and 62 per 1000 births, respectively.

18 The perinatal mortality rate (PMR) was 53 per 1000. Preterm birth [OR: 2.89, 95% CI: 1.67-  
19 5.00], twin deliveries (OR: 2.80, 95% CI: 1.10-7.15), and cesarean section (2.21, 95% CI: 1.15-  
20 4.23) were the strongest predictors of mortality.

21 Conclusions: The perinatal mortality rate associated with this cohort of patients with high-acuity  
22 conditions of pregnancy was nearly two times the most recent rate for India as a whole (28 per  
23 1000 births). EMS data has the potential to provide more robust estimates of PMR, reduce

1  
2  
3 1 inequities in timely access to healthcare, and increase facility-based care through service of  
4  
5 2 marginalized populations.  
6  
7  
8 3  
9

#### 10 4 **STRENGTHS AND LIMITATIONS**

- 11 5 • This study is a novel, prospective assessment of perinatal mortality in India whose mothers  
12 6 utilized prehospital services within 7 days of delivery.
- 13 7 • Follow-up rates were excellent, with over 99% of patients followed at 7 days.
- 14 8 • Overall cumulative mortality rates at 2, 7 and 42-days follow-up were 41, 53 and 62 per 1000  
15 9 births, respectively.
- 16 10 • Generalisability may be limited as it was a convenience sample of a unique prehospital  
17 11 system across multiple states in India.
- 18 12 • Limited data regarding variability and quality of hospital management and therapeutics were  
19 13 collected

20 14 **KEYWORDS:** India, Accident and Emergency Medicine, Maternal Medicine—Obstetrics,  
21 15 Emergency Medical Services (EMS), Neonatal Mortality  
22 16

#### 23 17 **INTRODUCTION**

24 18 An estimated 2.6 million stillbirths and 2.7 million neonatal deaths occur globally each year.[1]

25 19 A disproportionate percentage (approximately 99%) of these deaths occur in low and middle-  
26 20 income countries. [2]  
27 21

28 22 India accounts for approximately one-quarter of global newborn deaths, with an estimated  
29 23 760,000 neonatal deaths in 2012. While India has made laudable progress in reducing overall  
30  
31  
32  
33  
34  
35  
36  
37  
38  
39  
40  
41  
42  
43  
44  
45  
46  
47  
48  
49  
50  
51  
52  
53  
54  
55  
56  
57  
58  
59  
60

1 child mortality over the past 25 years, similar reductions in neonatal mortality have lagged. As a  
2 result, India fell short of the Millennium Development Goal (MDG-4) of a two-thirds reduction  
3 in under-five mortality from 1990-2015. [3]

4  
5 Globally, the overall number of neonatal deaths has declined significantly, yet they account for  
6 an increasing proportion of under-five deaths.[4,5] Attempts to reduce deaths around the time of  
7 childbirth have been particularly challenging.[6] In 2013, India's perinatal mortality rate (PMR),  
8 or the number of third trimester stillbirths (after 28 weeks gestational age) and neonatal deaths in  
9 the first 7 days, was 28 per 1000 total births.[7] Most agree that this likely underestimates the  
10 overall perinatal mortality given the difficulty in capturing stillbirths and deaths that occur at  
11 home. [8]

12  
13 Previous research on evidence-based approaches to reducing young infant mortality have  
14 included efforts to increase access to preventive and curative antenatal, perinatal and postnatal  
15 care.[9] To date, however, little attention has focused on the role and quality of pre-hospital care  
16 and transport on describing neonatal outcomes in developing countries. Pre-hospital care in India  
17 has the potential to capture those deaths that occur at home and are not transferred to the  
18 hospital. At the same time, prehospital care increases access to skilled birth attendants and  
19 facility-based health services, while also providing early lifesaving interventions during transport  
20 that can reduce overall neonatal mortality. Recent data from two states in India demonstrate  
21 substantial reductions in neonatal and infant mortality rates associated with pre-hospital  
22 services.[10] This study aims to report the perinatal mortality among a cohort of young infants,  
23 born to laboring women in five Indian states who were transported by an ambulance service with

1 trained emergency medical technicians (EMTs). Secondly we report on the demographic,  
2 maternal indicators and clinical management associated with increased rates of perinatal death.

## 3 4 **METHODS**

5 Over a 6-week period, from February-April 2014, research assistants enrolled a convenience  
6 sample of neonates born to women in their third trimester of pregnancy who called for GVK  
7 Emergency Management and Research Institute (GVK EMRI) ambulance transport for  
8 pregnancy-related complaints. Neonates were enrolled from one of five participating Indian  
9 states: Andhra Pradesh, Assam, Gujarat, Karnataka, and Meghalaya (Figure 1).

## 10 11 **GVK EMRI**

12 GVK EMRI, named after [Gunupati Venkata Krishna](#), is a not-for-profit, public-private  
13 partnership that provides free ambulance transport and pre-hospital stabilization care that can be  
14 accessed using a three-digit, toll-free phone number. Launched in 2005, GVK EMRI is currently  
15 the largest provider of emergency medical services in India (and in the world), operating in 17 of  
16 28 Indian states and union territories and representing a catchment population of 750 million  
17 people. Obstetric emergencies comprise the single largest category of GVK EMRI's pre-hospital  
18 transports, with upwards of 30% of all calls being pregnancy-related, totaling 3.1 million calls  
19 for pregnancy-related complaints in 2014.[11] This is in comparison to the US and European  
20 countries where maternal and pregnancy calls are often <1% of total.[12]

21  
22 Call management, dispatch, and online medical direction are provided by central state-based,  
23 emergency call centers that support a fleet of ambulances, strategically distributed to optimize



1 response times. Individual ambulance providers are dispatched based on availability and distance  
2 to the patient. The majority of ambulances are staffed by both a driver and a single  
3 emergency medical technician (EMT). EMTs are trained to provide basic emergency obstetric  
4 and neonatal care, including resuscitation and administration of life-saving medications, with  
5 oversight from real-time physician-guided medical direction available by phone. EMTs scope of  
6 practice around obstetric, gynecologic and neonatal care are driven by standard protocols (see  
7 online supplementary material 1) Patients are transported to the nearest appropriate public or  
8 private care facility unless they request an alternate facility.

## 11 **Enrollment Process**

12 Patients were enrolled six days a week, Monday through Saturday, during daytime hours for six  
13 hours per day. Enrollment was limited to this time frame given constraints of research assistant  
14 availability, safety and cost. Any woman in her third trimester of pregnancy who called for a  
15 pregnancy-related complaint was eligible for enrollment. A call was considered “pregnancy-  
16 related” if it was categorized by the dispatch officer as a call for “pregnancy”, “childbirth”,  
17 “miscarriage”, or “labor pains”. Exclusion criteria included calls for inter-facility transfers,  
18 patients who were absent upon EMT arrival, and patients who refused care. Newborns of women  
19 callers were enrolled if born to a mother within seven days of the initial call.

## 21 **Data Collection**

1  
2  
3 1 EMTs collected demographic, historical and current clinical data related to both maternal and  
4  
5 2 neonatal care during and after ambulance transport. This information was relayed and  
6  
7 3 categorized by research assistants via telephone in real time.  
8  
9  
10 4

11  
12  
13 5 Neonates were matched to maternal demographic, prenatal characteristics and pre-hospital care.  
14  
15 6 Demographic data included geography, economic status (defined by maternal possession of the  
16  
17 7 low-income government health insurance programme white ration card), prior maternal  
18  
19 8 education, and current employment. Social status was classified by maternal self-identified caste;  
20  
21 9 Lower social classes included 'scheduled caste' (lowest, most socially disadvantaged group),  
22  
23 10 'scheduled tribe' (socially and geographically disadvantaged), and 'backward caste'  
24  
25 11 (intermediary group socially). 'Other caste' included refers to those with the highest social  
26  
27 12 status.  
28  
29  
30  
31  
32  
33 13

34  
35 14 Among the subset of neonates delivered either prior to ambulance arrival or in the pre-hospital  
36  
37 15 setting (under the care of an EMT), direct neonatal clinical care data was also recorded. Newborn  
38  
39 16 infant gestational age was determined by maternal report often based on last menstrual period.  
40  
41  
42 17

43  
44 18 Two separate telephone numbers, the mother's and a friend's or relative's, were collected at the  
45  
46 19 time of enrollment to facilitate patient follow-up. All patients who delivered prior to emergency  
47  
48 20 medical services (EMS) arrival through 7 days after the dispatch call, were followed up by phone  
49  
50 21 at 48 hours, 7 days and 42 days postpartum.[13] The 42-day follow-up period was utilized to  
51  
52 22 capture maternal mortality as well as young infant outcomes.  
53  
54  
55  
56 23

1 Per GVK EMRI's standard protocol, all patients were verbally consented by responding EMTs  
2 for treatment, data collection, and follow-up at the time of enrollment. The study was approved  
3 by the Institutional Review Board at Stanford University (IRB#18185) and the Ethics and  
4 Research Committee at GVK EMRI.

## 6 **Data Analysis**

7 Initial patient data was recorded securely online using REDCap (Stanford University).[14] All  
8 data analysis was conducted via SAS Enterprise Guide for Windows, V.4.3 (SAS Institute Inc.,  
9 Cary, NC, USA). Both maternal and patient data was cleaned and de-identified for analyses.  
10 Descriptive demographic and maternal clinical data was provided as numbers and percentages  
11 where appropriate. In addition to descriptive data, main outcomes included medical interventions  
12 in the pre-hospital setting and mortality at each stage of follow-up. We were unable to  
13 differentiate stillbirths versus neonatal deaths that occurred on the day of delivery.

15 Wilcoxon rank sum and Chi-square tests were used to compare cases of early infant deaths to  
16 those that survived to 2, 7 and 42 days. Variables analysed included demography, items in the  
17 maternal prenatal and past medical history and in the medical care history in the pre-hospital  
18 setting, and delivery characteristics.

20 A multivariate model was constructed using variables that were significant from the Chi-square  
21 tests. State was not included in initial multivariate models, though it was controlled for in  
22 iterative analysis given the variability in enrollment and proportional variability in early infant  
23 death from state to state. Odds ratios (ORs) and 95% confidence intervals (CI) were used to

1 assess the association of individual variables with infant death.

2

### 3 RESULTS

4 A total of 1,411 (83.8%) of the 1,684 women enrolled gave birth to a total of 1,431 newborns  
 5 (including 40 twins, 2.8%) within 7 days of calling for ambulance services (Table 1). This  
 6 represents approximately 1.7% of all pregnancy-related calls to GVK EMRI across the five states  
 7 during the study period.

8 **Table 1. Demographic and maternal health characteristics among neonates born to mothers using**  
 9 **Emergency Medical Services (EMS) in five states in India, February-April, 2014.**

|                                             | N=1431 | %     |
|---------------------------------------------|--------|-------|
| <b>Maternal Demographic Characteristics</b> |        |       |
| Age                                         |        |       |
| Median (Intra-quartile range, IQR)          | 23     | 21-26 |
| 15-19                                       | 70     | 4.9   |
| 20-24                                       | 809    | 56.5  |
| 25-29                                       | 434    | 30.3  |
| 30-34                                       | 92     | 6.4   |
| 35-39                                       | 23     | 1.6   |
| 40-44                                       | 3      | 0.2   |
| State                                       |        |       |
| Andhra Pradesh                              | 381    | 26.6  |
| Assam                                       | 201    | 14.0  |
| Gujarat                                     | 477    | 33.3  |
| Karnataka                                   | 342    | 23.9  |
| Meghalaya                                   | 30     | 2.1   |
| Geographic location                         |        |       |
| Rural/Tribal                                | 1323   | 92.5  |
| Urban                                       | 108    | 7.5   |
| Social status *                             |        |       |
| Backward caste                              | 508    | 35.5  |
| Other caste                                 | 284    | 19.8  |
| Scheduled caste                             | 254    | 17.7  |
| Scheduled tribe                             | 381    | 26.6  |
| Economic Status**                           |        |       |
| Pink ration card                            | 422    | 29.5  |
| White ration card                           | 987    | 69.0  |
| Education level completed                   |        |       |
| None                                        | 528    | 36.9  |
| Primary                                     | 357    | 24.9  |
| Secondary                                   | 381    | 26.6  |
| Intermediate                                | 81     | 5.7   |
| Graduate degree                             | 37     | 2.6   |

|                                |       |       |
|--------------------------------|-------|-------|
| Occupation                     |       |       |
| Homemaker                      | 1079  | 75.4  |
| Other                          | 352   | 24.6  |
| Medical history                |       |       |
| Anemia                         | 99    | 6.9   |
| Hypertension                   | 10    | 0.7   |
| Pulmonary disease              | 4     | 0.3   |
| HIV                            | 2     | 0.1   |
| Antenatal care visits (ANC)    |       |       |
| 1-3                            | 732   | 51.2  |
| >3                             | 671   | 46.9  |
| ≥1 visit with a physician      | 1,111 | 77.6  |
| Iron supplementation           | 1197  | 83.6  |
| Parity                         |       |       |
| Multiparous                    | 818   | 57.2  |
| Nulliparous                    | 613   | 42.8  |
| Age at first pregnancy***      |       |       |
| Median (IQR)                   | 21    | 20-22 |
| 15-19                          | 197   | 24.1  |
| 20-24                          | 550   | 67.2  |
| 25-29                          | 65    | 7.9   |
| 30-34                          | 3     | 0.4   |
| Years since prior pregnancy*** |       |       |
| <2                             | 364   | 44.5  |
| 2-3                            | 211   | 25.8  |
| >3                             | 237   | 29.0  |

\* Self-identified caste is used as a proxy for social status and in India and is often used in national population health level monitoring. Scheduled caste is the lowest, most socially disadvantaged group. 'Scheduled tribe' is also a disadvantaged group. 'Backward caste' is an intermediary group socially; and 'other caste' includes all those who do not belong to the aforementioned group and have the highest social status.

\*\* Economic status is defined by whether patients were dependent on the low-income government health insurance program (white ration card).

\*\*\*Of multiparous mothers only (n=818).

1  
2  
3  
4  
5  
6  
7  
8  
9  
10  
11  
12  
13  
14  
15  
16  
17  
18  
19  
20  
21  
22  
23  
24  
25  
26  
27  
28  
29  
30  
31  
32  
33  
34  
35  
36  
37  
38  
39  
40  
41  
42  
43  
44  
45  
46  
47  
48  
49  
50  
51  
52  
53  
54  
55  
56  
57  
58  
59  
60

1  
2  
3  
4  
5

Most neonates were born to mothers from rural or tribal areas (n=1,323, 92.5%), lower economic status (n=987, 69.0%), lower social class (n=1,143, 79.9%), and had less than a secondary education (n=885, 61.8%).

1 At the time of initial ambulance call, 82.5% (n=1,180) of women were term gestation (37-42  
 2 weeks), 97.2% (n=1391) reported contractions or abdominal pain, 31.0% (n=443) had rupture of  
 3 membranes (ROM) with contractions and 7.9% (n=113) had vaginal bleeding (Table 2).

5 **Table 2. Characteristics of neonates peri-EMS transport in five states in India, February-April,**  
 6 **2014**

|                                                         | N=1431 | %         |
|---------------------------------------------------------|--------|-----------|
| <b>Prehospital Characteristics</b>                      |        |           |
| Gestational age (weeks) at transport                    |        |           |
| Median (IQR)                                            | 39.7   | 38.4-40.0 |
| <32                                                     | 32     | 2.2       |
| 32-36                                                   | 164    | 11.5      |
| 37-42                                                   | 1180   | 82.5      |
| >42                                                     | 38     | 2.7       |
| Receiving hospital type                                 |        |           |
| Government                                              | 1181   | 79.7      |
| Private/Paid                                            | 187    | 13.2      |
| Trust/NGO                                               | 50     | 3.5       |
| Distance from scene to facility (km)                    |        |           |
| Time from call to facility (min)                        | 65     | 50-84     |
| Presentation                                            |        |           |
| Contractions                                            | 1391   | 97.2      |
| Rupture of membranes                                    | 443    | 31.0      |
| Vaginal bleeding                                        | 113    | 7.9       |
| Abnormal maternal vital recorded                        |        |           |
| HR ≥100                                                 | 112    | 7.8       |
| SBP <90                                                 | 16     | 1.2       |
| SBP ≥140 AND <160 or DBP ≥90 AND <110                   | 192    | 13.4      |
| SBP ≥160 or DBP ≥110                                    | 20     | 1.4       |
| RR ≥30                                                  | 1      | 0.1       |
| Emergency Medical Technician (EMT) actions              |        |           |
| Left lateral positioning                                | 1364   | 95.3      |
| Oxygen provided                                         | 331    | 23.1      |
| IV placed                                               | 165    | 11.5      |
| <b>Delivery Characteristics</b>                         |        |           |
| When delivered                                          |        |           |
| Prior to ambulance arrival                              | 37     | 2.6       |
| After ambulance arrival and prior to hospital admission | 45     | 3.1       |
| Within 48 hours                                         | 1285   | 89.8      |
| Within 7 days                                           | 64     | 4.5       |
| In-hospital                                             |        |           |
| Term (>37 week gestation)                               | 1274   | 89.1      |
| Vaginal                                                 | 1223   | 85.5      |
| Twin                                                    | 1170   | 81.8      |
|                                                         | 40     | 2.80      |

1 Abnormal pre-hospital vital signs (pulse rate >99, respiratory rate >29, systolic blood  
 2 pressure <90 or >140, or diastolic blood pressure >90) were documented in 22.1% (n=301) of  
 3 women. Of those women with tachycardia (n=112), 89.3% (n=100) were placed in the left lateral  
 4 position and 10.7% (n=12) received intravenous (IV) fluids. Among those women with  
 5 documented hypotension (n=16) 75.0% (n=12) were placed in the left lateral position, and 37.5%  
 6 (n=6) received intravenous (IV) fluids. In sum, four women died during this study, and all within  
 7 48 hours after hospital arrival (for further discussion of this high risk group see reference 13).

8  
 9 Prior to hospital admission, 82 (5.7%) neonates were delivered from 80 distinct mothers. Thirty-  
 10 seven delivered prior to ambulance arrival. EMTs assisted in the delivery of 45 neonates, either  
 11 on scene (where the ambulance picked up the patient), during transport or immediately on  
 12 hospital arrival. Another 1,349 (94.3%) deliveries occurred after EMS transport, with the  
 13 majority (n=1,285, 89.8%) occurring within 2 days of EMS dispatch. Of the deliveries that  
 14 followed EMS transport, 1,274 (94.4%) occurred in the hospital and another 74 (5.5%) followed  
 15 hospital discharge.

16  
 17 The median distance from the scene to the hospital was 15 km [Inter-quartile range (IQR): 9-23].

18 The median time from initial call to hospital arrival was 65 minutes (IQR: 50-84).

19  
 20 The overall follow-up rates at 2, 7 and 42 days were 99.8%, 99.3% and 94.1%, respectively  
 21 (Table 3).

22  
 23 **Table 3. Follow-up and cumulative mortality stratified by Indian state, February-April, 2014.**

|  | Andhra | Assam | Gujarat | Karnataka | Meghalaya |
|--|--------|-------|---------|-----------|-----------|
|--|--------|-------|---------|-----------|-----------|

|                      |        | Pradesh |      |     |      |     |      |     |      |    |      |
|----------------------|--------|---------|------|-----|------|-----|------|-----|------|----|------|
|                      |        | N       | %    | N   | %    | N   | %    | N   | %    | N  | %    |
| N                    |        | 381     |      | 201 |      | 477 |      | 342 |      | 30 |      |
| Follow-up            |        |         |      |     |      |     |      |     |      |    |      |
|                      | 2 Day  | 379     | 99.5 | 201 | 100  | 477 | 100  | 341 | 99.7 | 30 | 100  |
|                      | 7 Day  | 378     | 99.2 | 199 | 99.0 | 475 | 99.6 | 339 | 99.1 | 30 | 100  |
|                      | 42 Day | 359     | 94.2 | 180 | 89.6 | 444 | 93.1 | 334 | 97.7 | 30 | 100  |
| Cumulative Mortality |        |         |      |     |      |     |      |     |      |    |      |
|                      | 2 Day  | 13      | 3.4  | 7   | 3.5  | 18  | 3.8  | 13  | 3.8  | 5  | 16.7 |
|                      | 7 Day  | 14      | 3.7  | 12  | 6.0  | 31  | 6.5  | 14  | 4.1  | 5  | 16.7 |
|                      | 42 Day | 14      | 3.9  | 13  | 7.2  | 37  | 8.3  | 14  | 4.2  | 6  | 20.0 |

In sum, 62 neonates died by day 2, 76 neonates died by day 7 and a total of 84 young infants perished by day 42 (Table 4). Cumulative mortality rates were 53 and 62 per 1000 births at 7 and 42-day follow-up, respectively. The calculated PMR was 53 deaths per 1000 births. There was variation in state PMR with the highest 7-day mortality rate was in the state of Meghalaya (166 per 1000,  $p=0.019$ ). PMRs in Andhra Pradesh, Assam, Gujarat and Karnataka were 37, 60, 65 and 41 per 1000, respectively. Other demographic indicators, including economic, social (caste status), education or occupational status of the mother were not significantly related to mortality in univariate analysis.

**Table 4. Characteristics and factors associated with perinatal mortality in five states in India, February-April, 2014.**

|                                             | Alive  |      | Dead |      | P-value      |
|---------------------------------------------|--------|------|------|------|--------------|
|                                             | N=1345 | %    | N=76 | %    |              |
| <b>Maternal Demographic Characteristics</b> |        |      |      |      |              |
| Rural or tribal geography                   | 1243   | 92.4 | 72   | 94.7 | 0.652        |
| State                                       |        |      |      |      |              |
| Andhra Pradesh                              | 364    | 27.1 | 14   | 18.4 | 0.972        |
| Assam                                       | 187    | 13.9 | 12   | 15.8 | 0.645        |
| Gujarat                                     | 444    | 33.0 | 31   | 40.8 | 0.162        |
| Karnataka                                   | 325    | 24.2 | 14   | 18.4 | 0.253        |
| Meghalaya                                   | 25     | 1.9  | 5    | 6.6  | <b>0.019</b> |
| Social status                               |        |      |      |      |              |
| Other caste                                 | 270    | 20.1 | 12   | 15.8 | 0.356        |
| Non-other caste                             | 1071   | 79.6 | 64   | 84.2 |              |



|    |                                           |      |      |    |      |              |
|----|-------------------------------------------|------|------|----|------|--------------|
| 1  | Economic status                           |      |      |    |      |              |
| 2  | Pink ration card                          | 396  | 29.4 | 24 | 31.6 | 0.639        |
| 3  | White ration card                         | 930  | 69.1 | 50 | 65.8 |              |
| 4  | Education level                           |      |      |    |      |              |
| 5  | No prior schooling                        | 489  | 36.4 | 32 | 42.1 | 0.332        |
| 6  | Attended school                           | 811  | 60.3 | 42 | 55.3 |              |
| 7  | Homemaker                                 | 1014 | 75.4 | 59 | 77.6 | 0.658        |
| 8  | ≥2 years since prior delivery             | 423  | 31.4 | 23 | 30.3 | 0.802        |
| 9  | <b>Maternal Prenatal Characteristics</b>  |      |      |    |      |              |
| 10 | Prenatal iron supplementation             | 1129 | 83.9 | 60 | 78.9 | 0.248        |
| 11 | ≥1 visit with a physician                 | 1046 | 77.8 | 57 | 75.0 | 0.532        |
| 12 | <4 ANC visits                             | 677  | 50.3 | 49 | 64.5 | <b>0.019</b> |
| 13 | <b>Current Maternal and Neonatal Care</b> |      |      |    |      |              |
| 14 | Any abnormal maternal vital sign          | 264  | 19.6 | 27 | 35.5 | <b>0.019</b> |
| 15 | C-section                                 | 107  | 8.0  | 13 | 17.1 | <b>0.005</b> |
| 16 | Delivery prior to hospital admission      | 73   | 5.4  | 6  | 7.9  | 0.361        |
| 17 | In-hospital                               | 1197 | 89.0 | 68 | 89.5 | 0.911        |
| 18 | IV placed in mother                       | 148  | 11.0 | 13 | 17.1 | 0.103        |
| 19 | IV fluids given to mother                 | 56   | 4.2  | 9  | 11.8 | <b>0.018</b> |
| 20 | Maternal tachycardia (HR≥100)             | 102  | 7.6  | 10 | 13.2 | 0.081        |
| 21 | Left lateral position during transport    | 1287 | 95.7 | 69 | 90.8 | <b>0.047</b> |
| 22 | Premature rupture of membranes            | 62   | 4.6  | 8  | 10.5 | <b>0.021</b> |
| 23 | Preterm (<37 weeks)                       | 167  | 12.4 | 18 | 23.7 | <b>0.005</b> |
| 24 | Twin                                      | 33   | 2.5  | 7  | 9.2  | <b>0.001</b> |

1  
2  
3  
4  
5  
6  
7  
8  
9  
10  
11  
12  
13  
14  
15  
16  
17  
18  
19  
20  
21  
22  
23  
24  
25  
26  
27  
28  
29  
30  
31  
32  
33  
34  
35  
36  
37  
38  
39  
40  
41  
42  
43  
44  
45  
46  
47  
48  
49  
50  
51  
52  
53  
54  
55  
56  
57  
58  
59  
60

1 Univariate analysis among all mothers identified the following maternal risk factors for elevated neonatal mortality at 7 days: less than four antenatal care (ANC) visits (p=0.019), abnormal vital signs (p=0.049), maternal IV placement (p=0.007) and IV fluids given (p = 0.018), and mother not placed in left lateral position during transport (p=0.047). Of those infants delivered in the presence of pre-hospital care providers, the cumulative mortality rate at 42 days was 122 per 1000 (n=5) with 4 infants lost to follow-up.

1 The association between maternal and infant characteristics and death at 7 and 42-day follow-up was also assessed through multivariate logistic regression (Table 5). At 42-day follow-up, preterm birth (OR = 2.89, 95% CI = 1.67-5.00) and twin deliveries (OR = 2.80, 95% CI = 1.10-7.15) were the strongest predictors of mortality. Other maternal risk factors raising the likelihood

1 of young infant death included not being placed in the left lateral position en-route to the hospital  
 2 (OR = 2.44, 95% CI = 1.06-5.61), heart rate greater than 100 (OR = 2.21, 95% CI = 1.13-4.35),  
 3 or having a caesarean section delivery (OR = 2.21, 95% CI = 1.15-4.23). The risk of death was  
 4 nearly two-fold higher for young infants born to mothers who went to fewer than four ANC  
 5 visits (OR = 1.89, 95% CI = 1.14-3.14).

6  
 7 Controlling for geographic (state-to-state) variability in overall PMR led to some changes in the  
 8 multivariate regression model for 42-day mortality. Prematurity (OR = 3.08, 95% CI = 1.77-  
 9 5.35), twin delivery (OR = 2.79, 95% CI = 1.07-7.23), fewer than four ANC visits (OR = 1.72,  
 10 95% CI = 1.03-5.89), and caesarean section delivery (OR = 2.20, 95% CI = 1.09-4.45) continued  
 11 to be independent predictors of overall young infant mortality, while maternal tachycardia (OR =  
 12 1.76, 95% CI = 0.86-3.62) and maternal positioning (OR = 2.05, 95% CI = 0.87-4.85) were no  
 13 longer statistically significant.

15 **Table 5. Predictors of young infant mortality at 7- and 42-day follow-up by multivariate logistic**  
 16 **regression models**

|                                      | 7 Days |           | 42 Days |           |
|--------------------------------------|--------|-----------|---------|-----------|
|                                      | OR     | 95 % CI   | OR      | 95 % CI   |
| Prematurity (<37 weeks)              | 2.21   | 1.19-4.09 | 2.89    | 1.67-5.00 |
| Twin delivery                        | 3.87   | 1.56-9.64 | 2.80    | 1.10-7.15 |
| C-section                            | 1.93   | 0.92-4.03 | 2.21    | 1.15-4.23 |
| <4 ANC visits                        | 1.76   | 1.02-3.02 | 1.89    | 1.14-3.14 |
| Not placed in left lateral position* | 1.67   | 0.62-4.46 | 2.44    | 1.06-5.61 |
| Maternal HR $\geq$ 100*              | 1.57   | 0.70-3.52 | 2.21    | 1.13-4.35 |

\*When controlled by state these variables were no longer statistically significant.

23

## 24 DISCUSSION

### 25 Reducing the equity gap

1 Elevated neonatal mortality has been shown globally to be associated with various forms of  
2 marginalisation, including poverty, low maternal education, and low social standing.[15]  
3 Previous programs to reduce neonatal mortality have focused on reducing the equity gap—  
4 reaching women and newborn infants in greatest need and those with limited access to formal  
5 healthcare services.[16-18] This prospective study suggests EMS plays an important, but under-  
6 appreciated role in reaching women from a lower socioeconomic strata and adds to prior data  
7 supporting the role of centralized EMS services in maternal and neonatal health policy.[10] Pre-  
8 hospital interventions and rapid transport when coupled with current data on known community  
9 and hospital-based risks has the potential to lead to development of interventions aimed at further  
10 reducing neonatal deaths.[19-21]

11 Ambulance services cared for a population—93% from lower social or economic strata— that  
12 historically has had less timely access to formal medical services. EMTs performed essential pre-  
13 hospital services, including assisting with the delivery of newborns in the field and during  
14 transport to the hospital. In 94% of all transports, EMTs connected women and neonates to  
15 health facilities offering obstetric care in less than two hours.

16 The absence of an association between mortality and social determinants of health, such as  
17 socioeconomic status or education level, was unexpected. However, the overwhelmingly high  
18 number of neonates from lower socioeconomic classes in our study cohort decreased our ability  
19 to detect the impact of these demographic characteristics on mortality. Furthermore, the impact  
20 of socioeconomic status on neonatal mortality may be very closely linked to the lack of access to  
21 care customary to these populations. In our study, where the majority of mothers were from  
22 disadvantaged backgrounds, this link did not exist. EMS may serve to overcome many factors  
23 that have traditionally been thought to limit healthcare access for poor and marginalized

1 populations; thus, access to care was broadly provided for all populations by the responding  
2 EMTs and subsequent ambulance transport. This suggests that delivery of EMS may be an  
3 important means to achieving greater equity in healthcare delivery.

#### 4 **Quality of Pre-hospital Care**

5 Deficits in the quality of India's pre-hospital care of pregnant women persist. Maternal  
6 haemodynamic instability has significant risks for neonatal health,[22,23] and subsequent  
7 maternal resuscitation, whether through positioning or administration of fluids, has been shown  
8 to increase cardiac output and stroke volume—effectively improving maternal and, by-proxy,  
9 neonatal haemodynamics, even among those women who deliver after hospital arrival.[24,25]  
10 Continued training aimed at EMT recognition of high-risk patients and treatment with simple  
11 interventions based on vital signs abnormalities is imperative. Ongoing quality assurance and  
12 training efforts are now aimed at increasing EMT recognition of high-risk patients, rates of fluid  
13 resuscitation and proper positioning during pre-hospital maternal resuscitation. Lastly prehospital  
14 interventions whether through patient positioning, fluid resuscitation, or timely diversion of  
15 high-risk patients to facilities with trained providers suggestive of a higher level of care all serve  
16 to affect births that occur after delivery.

#### 18 **Helping a high-risk population**

19 In developing countries, most perinatal deaths occur at home.[26] Several studies suggest that  
20 the reported PMR for all of India of 28 per 1000 births is also an underestimate given the  
21 difficulty in capturing stillbirths occurring at home.[8, 27] Estimates suggest that transitioning to  
22 institutional deliveries with a skilled birth attendant in lieu of traditional home deliveries could  
23 prevent over 500,000 stillbirths and 1.3 million annual neonatal deaths by 2020.[28,29] Yet, even

1 with transport to healthcare facilities, the estimated PMR of 53 deaths per 1000 births is nearly  
2 double the reported national average. While PMR varied considerably by state, all, except for  
3 Karnataka, had reported PMRs greater than previously reported averages for the year 2013. [7]  
4 Comparatively the PMR in our study ranged from 37-167 per 1000 in the five states, while  
5 published PMRs for Andhra Pradesh, Assam, Gujarat, and Karnataka ranged from 24-30 per  
6 1000.

7  
8 The high PMR is likely multifactorial. Prematurity (based on maternal report of gestational age)  
9 was found to be one of the strongest predictors of death. This relationship is consistent with  
10 global data identifying this as the number one cause of neonatal death.[30] While the proportion  
11 of prematurity in this study was similar to reported rates of India as a whole, the proportion of  
12 infants born premature who died within the first 7 days of life was higher than previous hospital-  
13 based studies. [31] Moreover, many deaths in preterm infants occur early in the neonatal period,  
14 and rapid intervention, made possible through transport under the care of an EMT to health care  
15 facilities with the capabilities to provide neonatal intensive care is critically important for  
16 survival.

17  
18 The natural twinning rate in the study was 14.0 per 1,000 births, almost double the estimated 7.2  
19 per 1,000 births reported across India.[32] Twin births were a significant predictor of death in  
20 this study (OR 2.8) and thus another important factor in the increased PMR.

21

1  
2  
3 1 The relationship between initial maternal hemodynamic instability and mortality of their infants  
4  
5 2 suggests that the level of acuity of our maternal cohort was high. Women may not recognize the  
6  
7 3 need to seek emergent care and are calling EMS only when they are in a very critical condition.  
8  
9  
10 4  
11  
12 5 Finally, almost half (47.4%) of women enrolled in our study attended less than the recommended  
13  
14 6 four ANC visits, a factor which proved to also be an important predictor of young infant  
15  
16 7 mortality in this study. Population based data for India shows similar ANC visitation rates at  
17  
18 8 around 51%. [1] The risk associated with a lack of ANC visits supports consensus based  
19  
20 9 recommendations emphasizing the importance of family planning and antenatal care, as women  
21  
22 10 in this study may have had complications that went unrecognized in the perinatal period and that  
23  
24 11 presented as emergencies necessitating the use of EMS.  
25  
26  
27  
28  
29  
30

31 13 Notably, the PMR associated with this cohort of patients was significantly higher than known  
32  
33 14 state averages and associated with risk factors that, when addressed in future efforts, will be  
34  
35 15 important in reducing neonatal mortality. In this study, however, we were unable to link records  
36  
37 16 from care pre-hospital care with those for hospital-based care, and thus we cannot comment on  
38  
39 17 the relationship between mortality and variability in post-transport facility-based care in India,  
40  
41 18 including treatments, disease course and cause of death in hospital.  
42  
43  
44  
45

46  
47 20 Additionally we were unable to differentiate stillbirths vs deaths that occurred on day one of life  
48  
49 21 and while this may serve to limit our recommendations we believe emergency response services  
50  
51 22 have the potential to improve data quality while at the same time promote equity in access to  
52  
53 23 healthcare services, and improve perinatal survival in India no matter the cause. The elevated  
54  
55  
56  
57  
58  
59  
60

1 PMR in this large patient cohort is reflective of the high-risk nature of this population and the  
2 need for further attention to coverage of these services, provision of high-quality tailored  
3 interventions and focused investigations to inform continuous improvement in EMS.  
4

## 5 **Acknowledgments**

6 We are grateful to the following for support in data collection and quality: Rajini Danthala,  
7 Aruna Gimkala, Divya Patel, Royal Uddin Ahmed, Steffy Christian, Eranna Gowda,  
8 Chandrashekhraswamy Kendadmath, Marada Lakshmana Rao, Rupjoy Maibangsa, Shylaja  
9 Muniyappa, Isberth Tham, and Sahyadri Venkateshappa and Aditya Mantha.  
10

11 **Conflict of Interest:** None exist.  
12

13 **Funding:** This research received no specific grant from any funding agency in the public,  
14 commercial or not-for-profit sectors  
15

16 **Data Sharing:** Extra data can be accessed via the Dryad data repository at <http://datadryad.org/>  
17 with the doi:10.5061/dryad.38n0n  
18  
19  
20  
21  
22

## 1 **References**

- 2 1. UNICEF. UNICEF Data: Monitoring the Situation of Children and Women.  
3 <http://data.unicef.org/child-mortality/neonatal.html>. Accessed June 24, 2016.
- 4 2. World Health Organization (WHO). The Partnership for Maternal, Newborn and Child  
5 Health. [http://www.who.int/pmnch/media/press\\_materials/fs/fs\\_newborndeath\\_illness/en/](http://www.who.int/pmnch/media/press_materials/fs/fs_newborndeath_illness/en/)  
6 Accessed February 4, 2016.
- 7 3. NIMS, ICMR and UNICEF. Infant and Child Mortality in India: Levels, Trends and  
8 Determinants, National Institute of Medical Statistics (NIMS), Indian Council of Medical  
9 Research (ICMR) and UNICEF India County Office, New Delhi, India, 2012.  
10 [http://unicef.in/CkEditor/ck\\_Uploaded\\_Images/img\\_1365.pdf](http://unicef.in/CkEditor/ck_Uploaded_Images/img_1365.pdf). Accessed November 8, 2015.
- 11 4. Shiffman J. Issue attention in global health: the case of newborn survival. *Lancet*. 2010; 375:  
12 2045–2049.
- 13 5. Black RE, Cousens S, Johnson HL, et al. Global, regional, and national causes of child  
14 mortality in 2008: a systematic analysis. *Lancet*. 2010;375:1969–1987.
- 15 6. Lawn JE, Blencowe H, Oza S, et al. Progress, priorities, and potential beyond survival.  
16 *Lancet*. 2014;384(9938):189–205.
- 17 7. Registrar General of India. Sample Registration System (SRS) statistical report 2012. New  
18 Delhi: 2013.  
19 [http://www.censusindia.gov.in/vital\\_statistics/SRS\\_Report\\_2012/2\\_At\\_a\\_glance\\_2012.pdf](http://www.censusindia.gov.in/vital_statistics/SRS_Report_2012/2_At_a_glance_2012.pdf)
- 20 8. Sankar MJ, Neogi SB, Sharma J, et al. State of newborn health in India. *Journal of*  
21 *Perinatology*. 2016;36(Suppl 3):S3-S8. doi:10.1038/jp.2016.183.
- 22 9. Koblinsky M, Matthews Z, Hussein J, et al. Lancet Maternal Survival Series steering group.  
23 Going to scale with professional skilled care. *Lancet*. 2006; 368(9544):1377-86.



- 1 10. Babiarz KS, Swaminatha MV, Divi N, et al. Ambulance service associated with reduced  
2 probabilities of neonatal and infant mortality in two Indian states. *Health Affairs*. 2016;  
3 35(10):1774-1782.
- 4 11. GVK Emergency Management Research Institute. National Daily Report, 2014. [Internal  
5 Report]. 2014.
- 6 12. NEMSIS. V2 911 Call Complaint vs. EMS Provider Findings Dashboard. 2016.  
7 [https://nemsis.org/view-reports/public-reports/version-2-public-dashboards/v2-911-call-](https://nemsis.org/view-reports/public-reports/version-2-public-dashboards/v2-911-call-complaint-vs-ems-provider-findings-dashboard/)  
8 [complaint-vs-ems-provider-findings-dashboard/](https://nemsis.org/view-reports/public-reports/version-2-public-dashboards/v2-911-call-complaint-vs-ems-provider-findings-dashboard/) Accessed December 20, 2017.
- 9 13. Strehlow MC, Newberry JA, Bills CB, et al. Characteristics and outcomes of women using  
10 emergency medical services for third-trimester pregnancy-related problems in India: a  
11 prospective observational study. *BMJ Open*. 2016; 6:7.
- 12 14. Harris P, Taylor R, Thielke R, Payne J, Gonzalez N, Conde J. Research electronic data  
13 capture (REDCap) - A metadata-driven methodology and workflow process for providing  
14 translational research informatics support. *J Biomed Inform*. 2009;42(2):377-81.
- 15 15. Matthews Z, Channon A, Neal S, Osrin D, Madise N, Stones W. Examining the "urban  
16 advantage" in maternal health care in developing countries. *PLoS Med*. 2010;7(9).
- 17 16. Victora CG, Barros AJ, Axelson H, et al. How changes in coverage affect equity in maternal  
18 and child health interventions in 35 Countdown to 2015 countries: an analysis of national  
19 surveys. *Lancet*. 2012;380:1149–56.
- 20 17. Mittal K, Gupta V, Khanna P, Kaushik JS, Sharma A. Evaluation of Integrated Management  
21 of Neonatal and Childhood Illness (IMNCI) algorithm for diagnosis and referral in under-five  
22 children. *Indian J Pediatr*. 2014;81(8):797-9.

- 1 18. Lassi ZS, Haider BA, Bhutta ZA. Community-based intervention packages for reducing  
2 maternal and neonatal morbidity and mortality and improving neonatal outcomes. *Cochrane*  
3 *Database Syst Rev* 2010;11: CD007754.
- 4 19. Darmstadt GL, Bhutta ZA, Cousens S, Adam T, Walker N, et al. Evidence-based, cost-  
5 effective interventions: how many newborn babies can we save? *Lancet*.  
6 2005;18;365(9463):977-88.
- 7 20. Knippenberg R, Lawn JE, Darmstadt GL, et al. Systematic scaling up of neonatal care in  
8 countries. *Lancet*. 2005;365:1087–1098.
- 9 21. Martines J, Paul VK, Bhutta ZA, et al. Neonatal survival: a call for action. *Lancet*. 2005; 365:  
10 1189–1197.
- 11 22. Grivell RM, Alfrevic Z, Gyte GM, Devane D. Antenatal cardiotocography for fetal  
12 assessment. *Cochrane Database Syst Rev*. 2015; Sep 12;9.
- 13 23. Devane D, Lalor JG, Daly S, McGuire W, Smith V. Cardiotocography versus intermittent  
14 auscultation of fetal heart on admission to labour ward for assessment of fetal wellbeing.  
15 *Cochrane Database Syst Rev*. 2012; Feb 15;2.
- 16 24. Fujitani S, Baldisseri MR. Hemodynamic assessment in a pregnant and peripartum patient.  
17 *Crit Care Med*. 2005;33(10) Suppl:S354–S361.
- 18 25. Clark SL, Cotton DB, Pivarnik JM, Lee W, Hankins GD, Benedetti TJ, et al. Position change  
19 and central hemodynamic profile during normal third-trimester pregnancy and postpartum.  
20 *Am J Obstet Gynecol*.1991;164(3):883–887.
- 21 26. Ensor T, Cooper S. Overcoming barriers to health service access: influencing the demand  
22 side. *Health Policy and Planning* 2004; 19:69–79.

- 1 27. SRS 2012 SRS Statistical Report 2012. Government of India: Ministry of Home Affairs,  
 2 Office of the Registrar General and Census Commissioner, India.  
 3 [http://www.censusindia.gov.in/vital\\_statistics/SRS\\_Reports\\_2012.html](http://www.censusindia.gov.in/vital_statistics/SRS_Reports_2012.html). Accessed January  
 4 22, 2016
- 5 28. Campbell OMR, Graham WJ, on behalf of The Lancet Maternal Survival Series steering  
 6 group. Strategies for reducing maternal mortality: getting on with what works. *Lancet*. 2006;  
 7 368:1284–99.
- 8 29. Bhutta ZA, Das JK, Bahl R, et al. Can available interventions end preventable deaths in  
 9 mothers, newborn babies, and stillbirths, and at what cost? *Lancet*. 2014; 384(9940):347-70.
- 10 30. Lawn JE, Blencowe H, Oza S, et al. Progress, priorities, and potential beyond survival.  
 11 *Lancet*. 2014;384(9938):189–205.
- 12 31. Rather GN, Jan M, Rafiq W, Gattoo I, Hussain SQ, Latief M. Morbidity and Mortality  
 13 Pattern in Late Preterm Infants at a Tertiary Care Hospital in Jammu & Kashmir, Northern  
 14 India. *J Clin Diagn Res*. 2015; 9(12): SC01–SC04.
- 15 32. Smits J, Monden C. Twinning across the Developing World. *PLOS One*. 2011; 6(9): e2523.

17 Figure 1 Legend. Availability of GVK Emergency Management and Research Institute (EMRI) services  
 18 and study enrollment by Indian state.

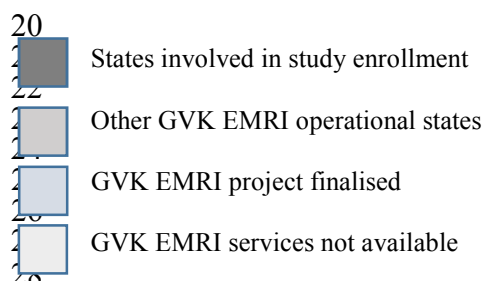

29 \*After the study's conclusion Andhra Pradesh was partitioned into two separate states: Telengana and  
 30 Andhra Pradesh

31

1  
2  
3  
4  
5  
6  
7  
8  
9  
10  
11  
12  
13  
14  
15  
16  
17  
18  
19  
20  
21  
22  
23  
24  
25  
26  
27  
28  
29  
30  
31  
32  
33  
34  
35  
36  
37  
38  
39  
40  
41  
42  
43  
44  
45  
46  
47  
48  
49  
50  
51  
52  
53  
54  
55  
56  
57  
58  
59  
60

1

For peer review only

1  
2  
3  
4  
5  
6  
7  
8  
9  
10  
11  
12  
13  
14  
15  
16  
17  
18  
19  
20  
21  
22  
23  
24  
25  
26  
27  
28  
29  
30  
31  
32  
33  
34  
35  
36  
37  
38  
39  
40  
41  
42  
43  
44  
45  
46  
47  
48  
49  
50  
51  
52  
53  
54  
55  
56  
57  
58  
59  
60

Figure 1. Availability of GVK Emergency Management and Research Institute (EMRI) services and study enrollment by Indian state.



\*After the study's conclusion Andhra Pradesh was partitioned into two separate states: Telengana and Andhra Pradesh

215x279mm (300 x 300 DPI)

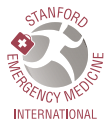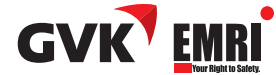

## CHILDBIRTH (Uncomplicated/Complicated)

### Key points

- Symptoms: Abdominal/back pain, vaginal bleeding/gush of fluid, minutes between contractions
- History of current pregnancy: Antepartum care, estimated gestational age, complications
- OB history: Number of pregnancies and c-sections, prior complications during pregnancy
- Physical exam: Inspecting external vaginal area for crowning/presenting part if patient feels like she wants to push or if she feels there is something protruding from her vagina
- *DO NOT* pull/push baby

### Serious signs and symptoms

- Part other than head presenting from vagina (arm, leg, umbilical cord)
- Excessive maternal bleeding
- Prolonged contractions (>6 contractions in 10 minutes or duration >2 minutes)
- Shortness of breath
- Altered mental status

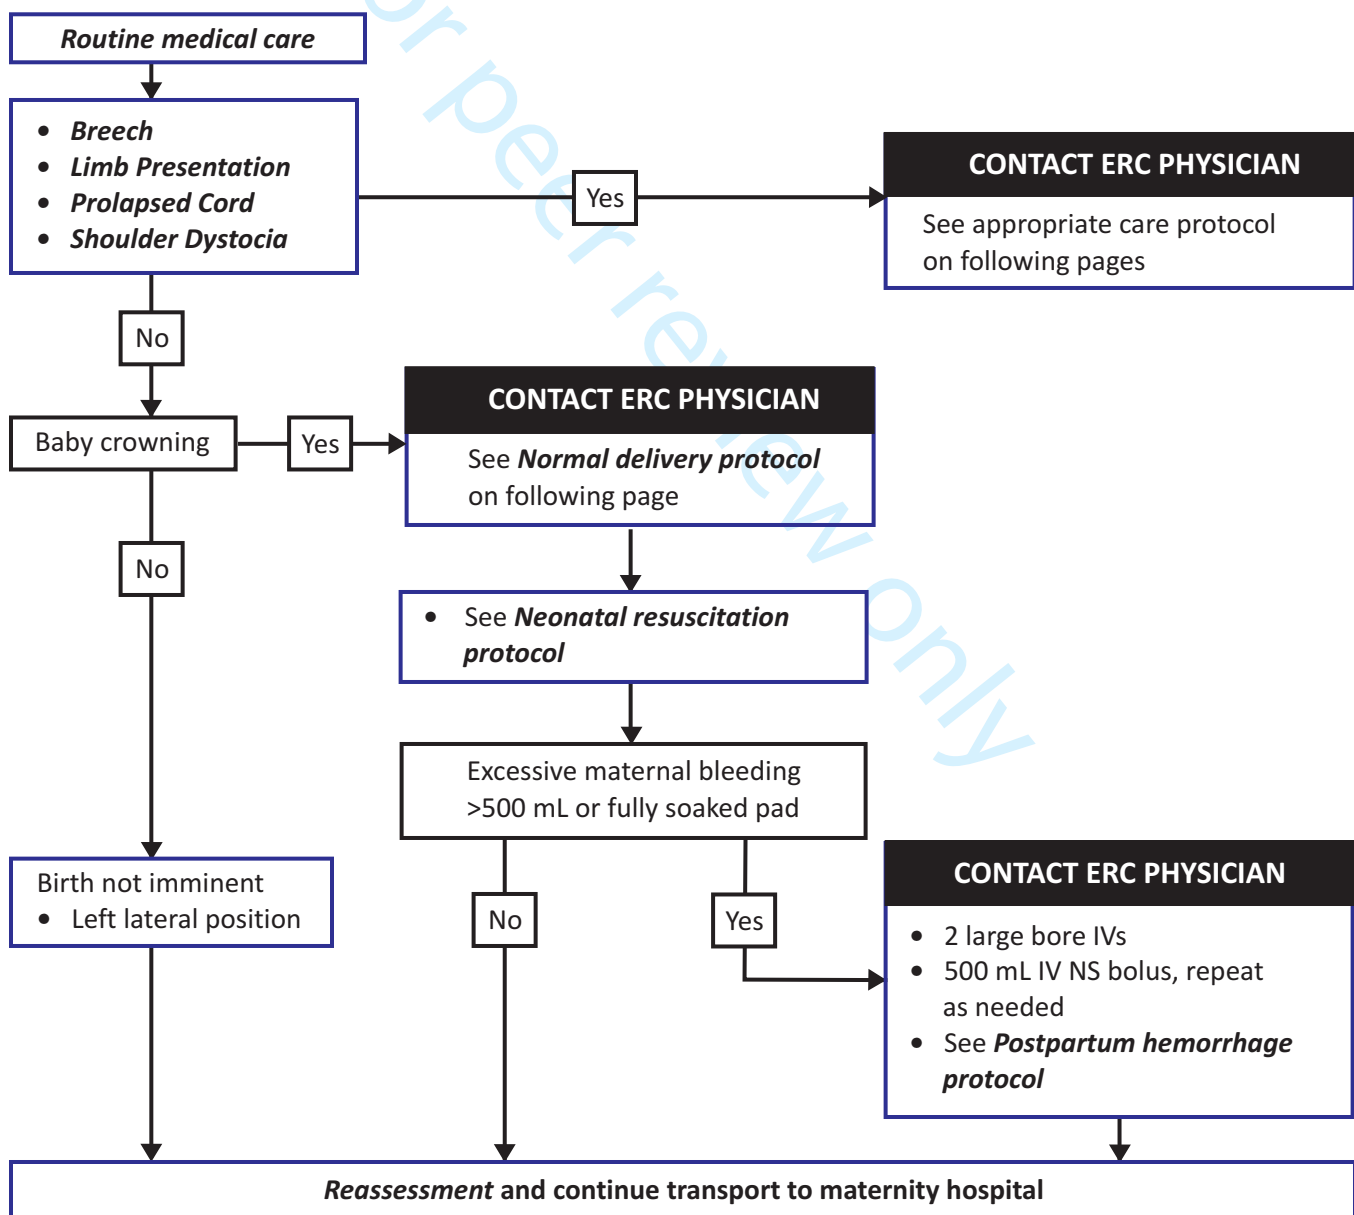

## Normal Delivery

- Position patient
- Prepare OB kit
- As head delivers, suction with bulb syringe (only if not spontaneously breathing)
- Check for cord wrapped around neck
- If cord around neck, slip over shoulders/head of baby
  - If unable to unwrap cord, place umbilical clamps 5 cm apart and cut cord between clamps
- Support head, deliver body
- Place baby next to mother; dry baby and keep warm (see *Neonatal resuscitation protocol*)
- See *Post delivery care* on last page

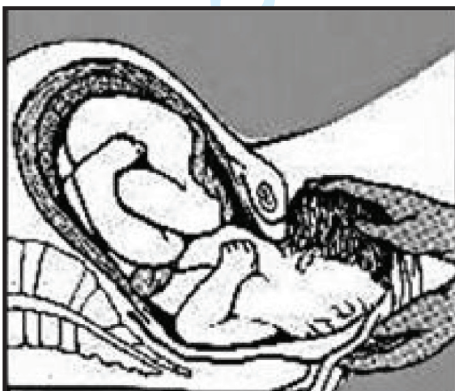

**Step 1: Support head and let head turn to side to align with body**

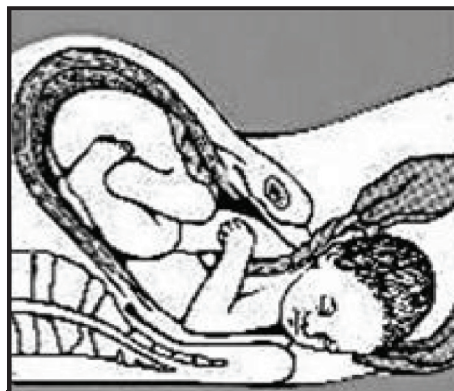

**Step 2: Check for cord and slip over head if present**

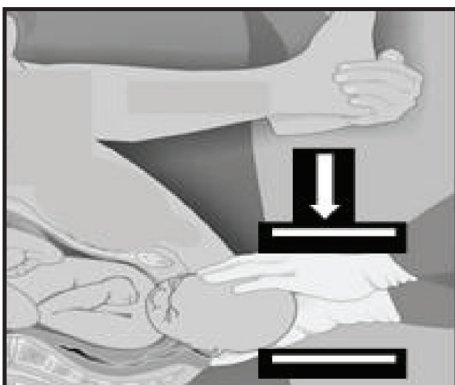

**Step 3: Keeping hands parallel to floor, apply downward pressure to deliver shoulder**

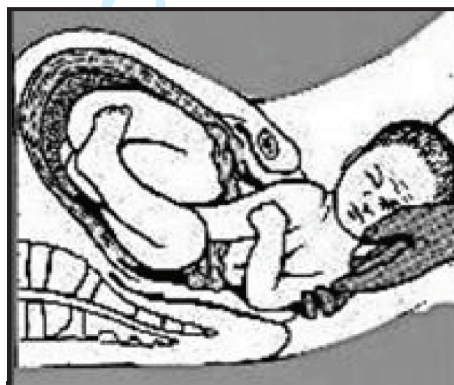

**Step 4: Support body and place next to mother**



## Shoulder Dystocia

### Definition

- Inability to deliver either shoulder within 60 seconds of delivery of head

### Key points

- Complications
  - Severe hypoxia, traumatic brachial plexus injuries and humerus/clavicle fractures
- *Turtle sign*: when fetal head moves back into the mother's perineum
- **HELPERR (HeLP-R** for BLSO provider denoted by \*below) mnemonic can assist with recall of correct actions

### Prehospital management options

- H: Call for Help\*
- E: Consider Episiotomy (only if additional space needed for hands to complete maneuvers below)
- L: Position Legs, pull knees to chest\*
- P: Suprapubic Pressure (not fundal)\*
- E: Enter vagina with hands to push on posterior aspect of anterior shoulder and other maneuvers
- R: Roll patient to knee to chest position, then deliver the posterior shoulder\*
- R: Remove the arm, sweep posterior arm across chest

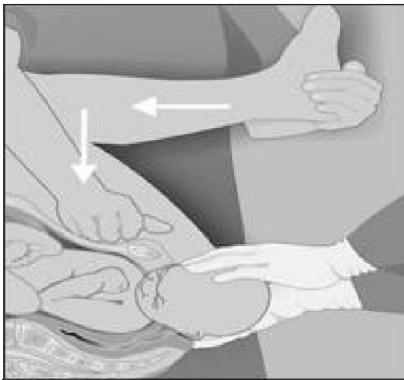

Legs: Pull knees up  
Pressure: Push down in suprapubic area (not fundal)

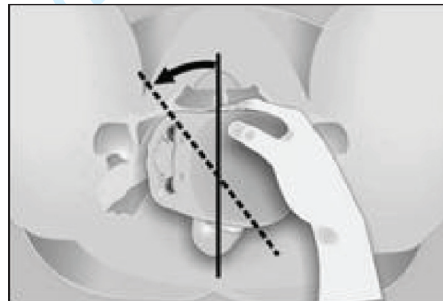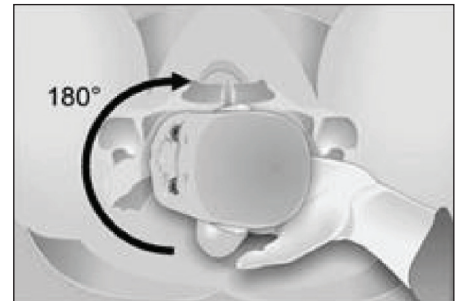

### Enter maneuvers:

- 1) Push anterior shoulder forward
- 2) Pressure: Push anterior shoulder backward and posterior shoulder forward

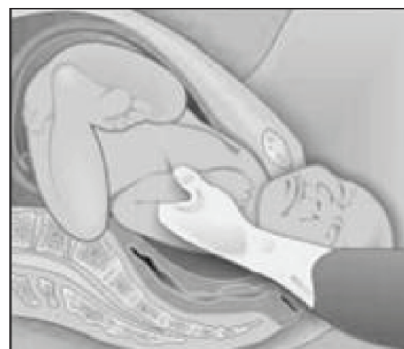

Remove posterior arm by bending at elbow and sweeping across chest and out

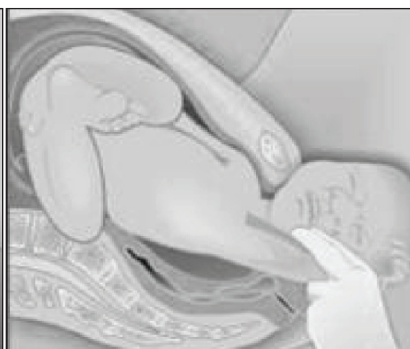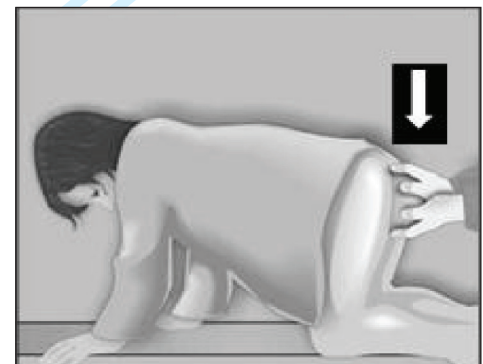

Roll on to knee chest position and deliver posterior shoulder first by gentle downward pressure on fetal head



## Breech Presentation

### Definition

- When buttocks (or legs) deliver first

### Key points

- Transport immediately
- *AVOID* delivery in ambulance if possible. Tell patient not to push.

### Prehospital management options

- Determine if buttocks or limb is presenting first
  - If limb (leg or arm) is presenting first, see **Limb presentation** section on the following page
- Delivery of breech presentation
  - Step 1
    - Support baby and allow delivery to proceed passively until base of umbilical cord is seen
    - *DO NOT* pull baby
  - Step 2
    - Grab the bony pelvis and femurs and apply gentle traction
    - *DO NOT* grab the abdomen as you may injure abdominal organs
  - Step 3
    - Once the wing-like scapulae are visible, rotate the fetus until a shoulder is anterior and deliver the arm. Rotate 180 degrees and deliver the other arm. Position the fetus so that the back is facing anteriorly.
  - Step 4
    - Anteriorly place a gloved middle finger on the fetus's occiput. The index and ring finger rest on the shoulders. Place a hand posteriorly sliding the index and middle finger into a V shape along the baby's face. Gently place pressure on the cheek bones.
    - Performing these maneuvers at the same time causes the fetal head to flex.
    - Additionally, one assistant can apply suprapubic pressure to help with flexion of the head. Another assistant can support the body.
- See **Post delivery care** section on last page

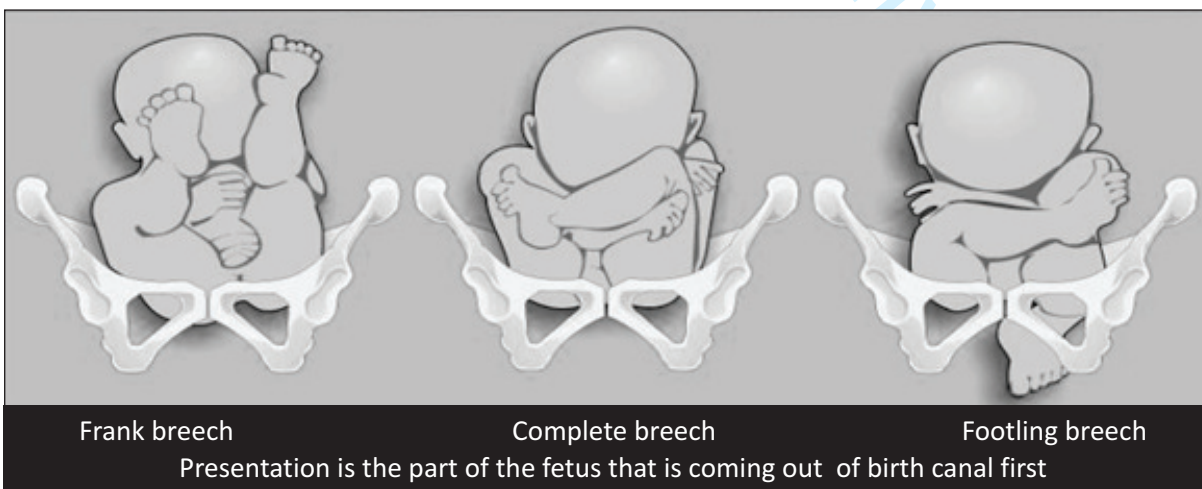

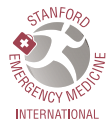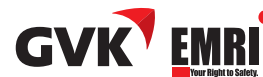

### Delivery Steps for Breech Presentation

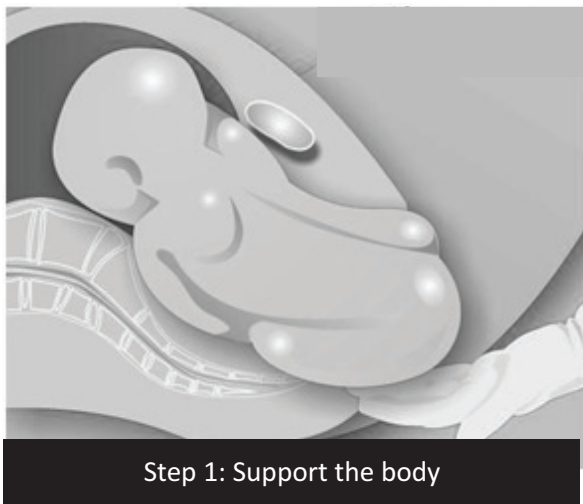

Step 1: Support the body

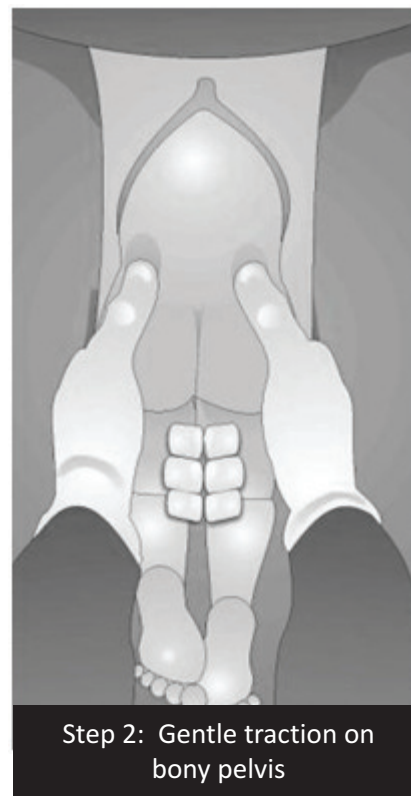

Step 2: Gentle traction on bony pelvis

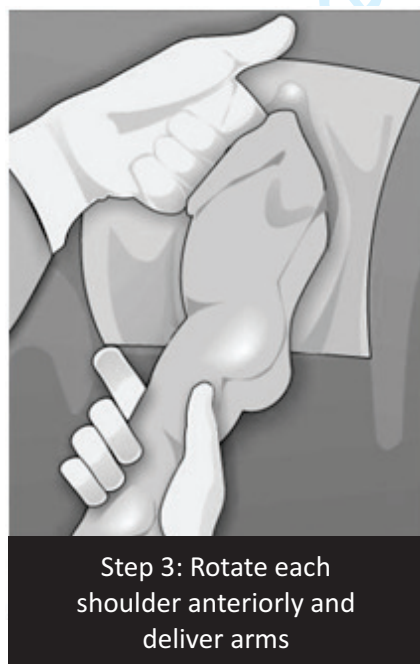

Step 3: Rotate each shoulder anteriorly and deliver arms

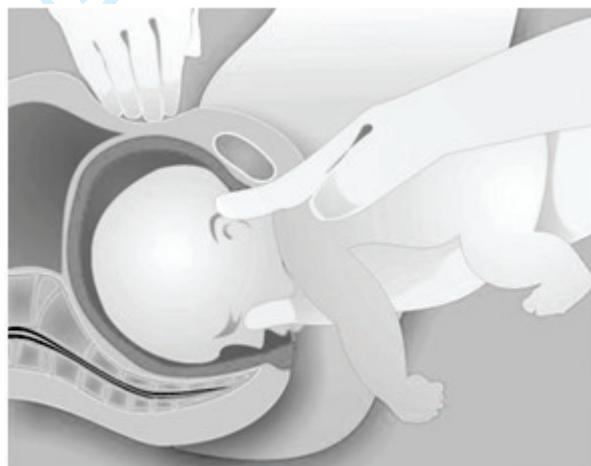

Step 4: Flex the fetal head by placing the middle finger on the occiput and the other middle and index finger on the cheek bones

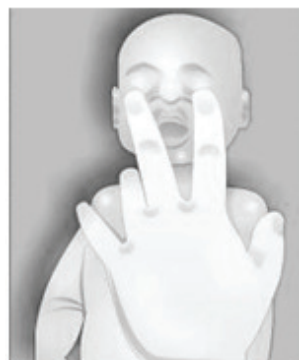

## Cord Presentation (Prolapsed Cord)

### Definition

- Umbilical cord presents/is seen before the head or other part of the baby

### Key points

- If the umbilical cord is compressed, blood flow and oxygen don't reach the baby
- Transport immediately and try to avoid delivery in the ambulance
- Tell the patient *NOT* to push

### Prehospital management options

- With two fingers of your gloved hand, gently push the presenting part of baby (not the cord) back up into the vagina until the presenting part no longer presses on the cord
  - *DO NOT* remove your hand (after elevating the presenting part of the baby) until arriving at the hospital and being relieved by other hospital personnel
- With your other hand, palpate the cord and feel the fetal HR. If <110 bpm, consider rolling the patient over and placing her in the *knee-chest position*. This may relieve pressure on the cord.

### Prolonged transport or in hospital management options

- Place a Foley (urinary) catheter in the bladder and fill with 500 mL of NS. Clamp the Foley.
- Wrap the cord loosely with a moist, warm dressing

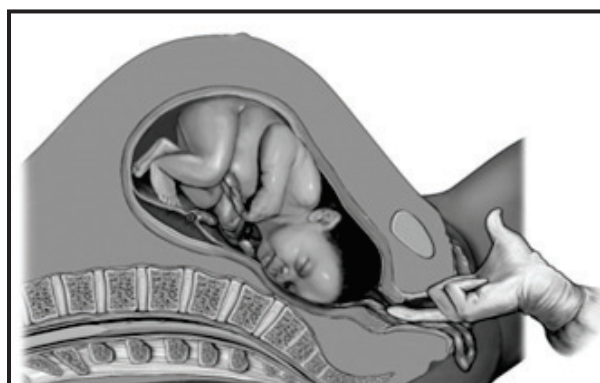

Once prolapsed cord is seen, push the presenting part (not the cord) gently back up

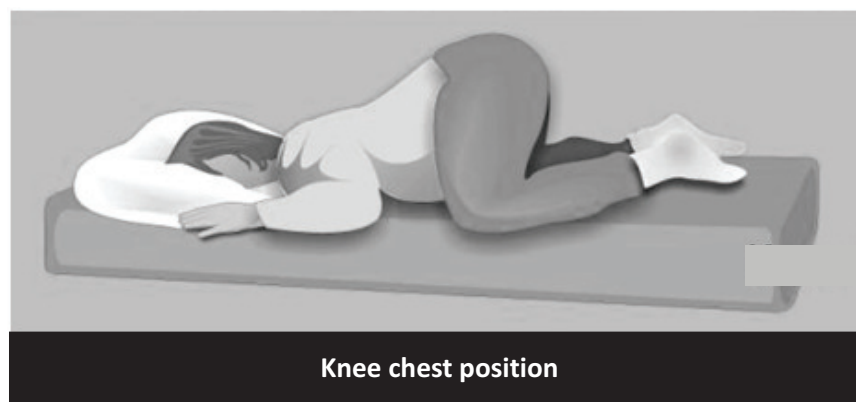

Knee chest position

## Limb Presentation

### Definition

- When one limb of the baby delivers first

### Key points

- Nearly all of these patients will require delivery by caesarean-section
- Transport immediately. Avoid delivery in the ambulance if possible.
- Tell the patient *NOT* to push.

### Prehospital management options

- Oxygen
- *DO NOT* attempt to deliver the baby
- *DO NOT* pull on the presenting limb
- *DO NOT* place your hand into the vagina unless there is a prolapsed cord  
(see **Cord presentation** section on previous page)

## Multiple Births

### Key points

- Usually both babies are born before the first placenta is delivered
- In order to prevent bleeding from the 2<sup>nd</sup> twin, carefully inspect the cord and apply a second clamp if leaking blood (oozing)
- Contractions usually restart within 5-10 minutes after the first baby is born; the second baby usually delivers within 30-45 minutes of the first baby

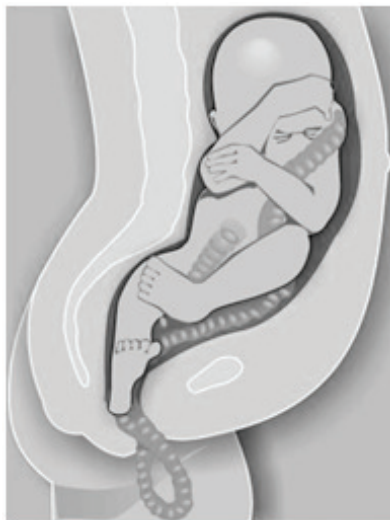

Limb presentation with prolapsed umbilical cord

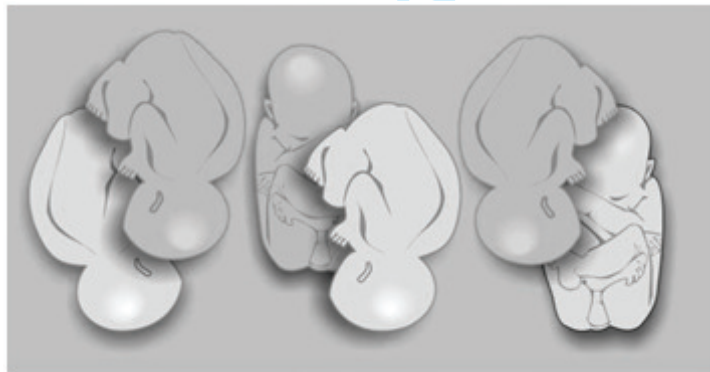

Twin gestations may present with the fetuses lying in multiple positions

## Post Delivery Care

### Active management of 3rd stage of labor (following delivery of all fetuses)

- See *Neonatal resuscitation protocol*
- **Oxytocin 10 Units IM** to mother immediately following delivery
  - Consider multiple fetuses and do not give until all babies are delivered
- Record time of birth
- Assess APGAR scores at 1 and 5 min after birth
- Wait until cord pulsations have stopped or 5 minutes have passed. Then, place two clamps on the cord at least 4-10 cm from the baby and cut between the clamps.
- Gently pull on the umbilical cord while providing suprapubic pressure (see below)
- Once the placenta delivers, place the placenta in a bag and give it to hospital staff
- Externally massage the uterus
- If significant ongoing bleeding or signs of maternal shock, see *Postpartum hemorrhage protocol*

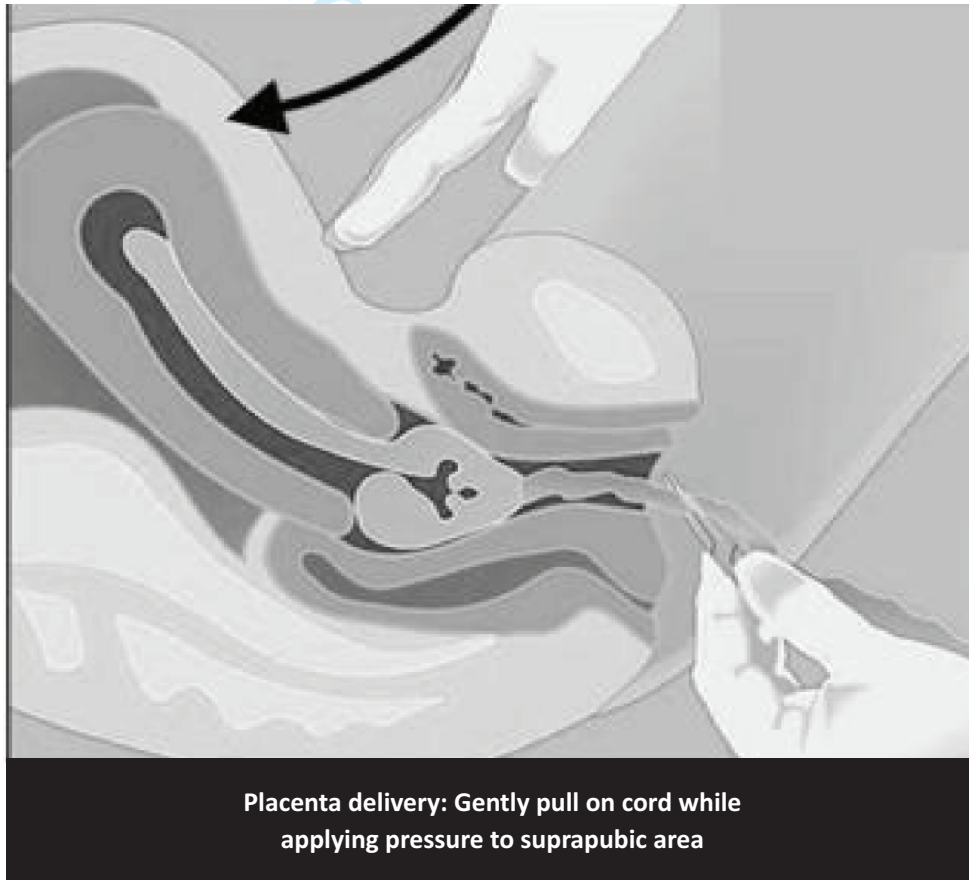

### References

- Advanced Life Support in Obstetrics (ALSO) Provider Course Syllabus Fourth Edition, Copyright 2009, American Academy of Family Physicians



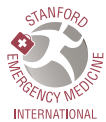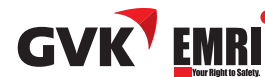

## POSTPARTUM HEMORRHAGE (PPH)

### Definition

- Greater than 500 mL of blood loss following delivery
- Severe PPH is >1000 mL of blood loss following delivery

### Key points

- Most common cause of maternal death in developing nations
- Active management of the third stage of labor can prevent 60% of PPH
- Rapidly evaluate for and correct possible causes
- Uterine atony (soft, boggy uterus) is the most common cause of PPH

### Serious signs and symptoms

- SBP <90
- HR >100
- Shortness of breath (RR >30)
- Altered mental status
- Cool or moist skin

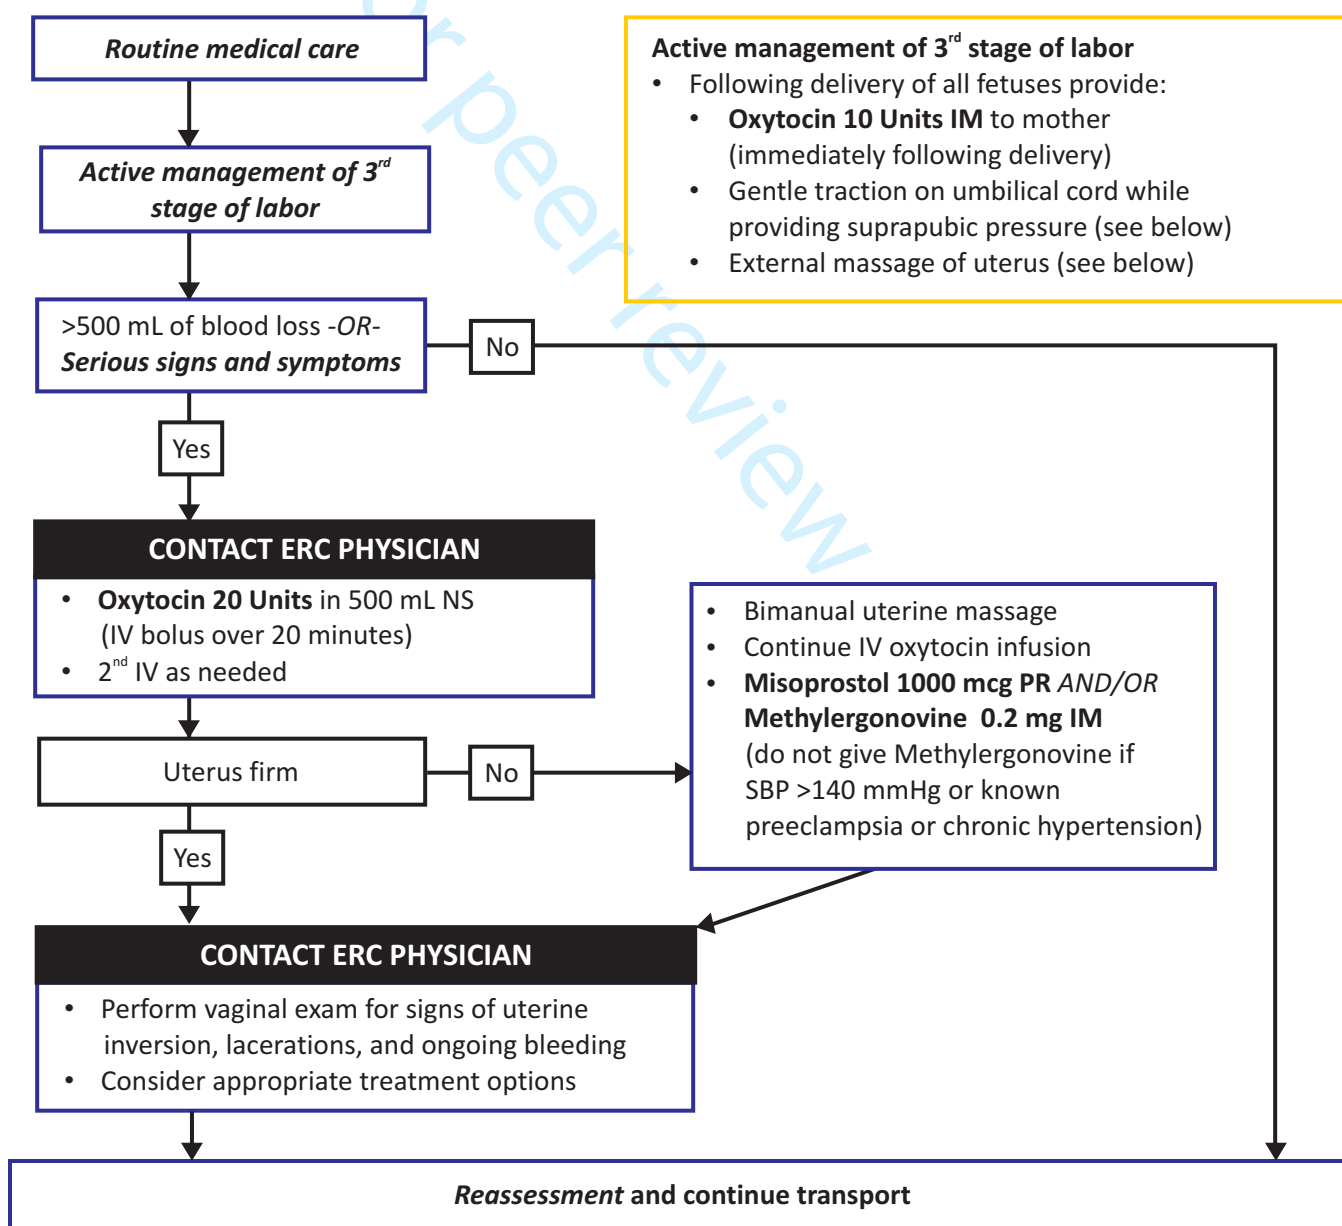

## ERC Physician

### Key points

- Decisions on management options should be based on the expected time to hospital arrival

| 4 T's           | Causes                                                                                                           | Prehospital treatment                                                                                                                          |
|-----------------|------------------------------------------------------------------------------------------------------------------|------------------------------------------------------------------------------------------------------------------------------------------------|
| <b>Tone</b>     | Decreased uterine tone                                                                                           | <ol style="list-style-type: none"> <li>1. Uterine massage</li> <li>2. Oxytocin</li> <li>3. Misoprostol</li> <li>4. Methylergonovine</li> </ol> |
| <b>Trauma</b>   | <ol style="list-style-type: none"> <li>1. Cervical/perineal lacerations</li> <li>2. Uterine inversion</li> </ol> | <ol style="list-style-type: none"> <li>1. Apply direct pressure</li> <li>2. Restore uterus (see below)</li> </ol>                              |
| <b>Tissue</b>   | Placenta retained                                                                                                | Manual removal                                                                                                                                 |
| <b>Thrombin</b> | Decreased clotting                                                                                               | Supportive measures                                                                                                                            |

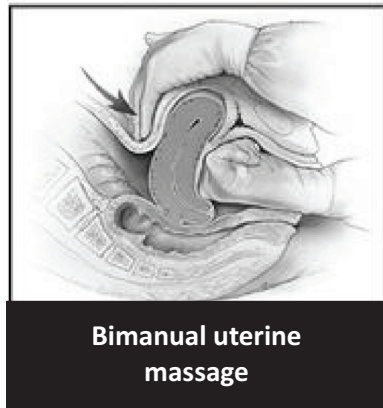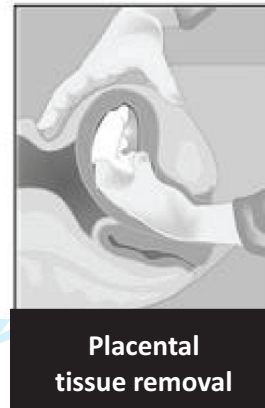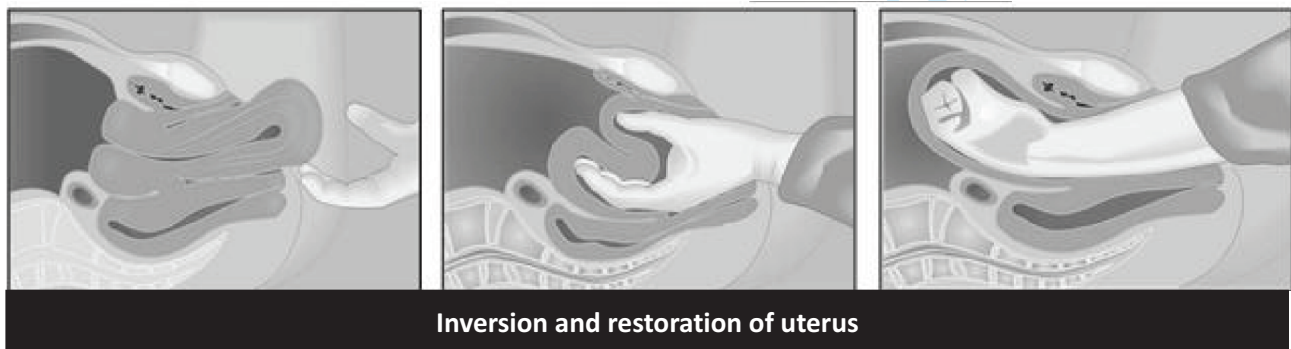

### References

- Advanced Life Support in Obstetrics (ALSO) Provider Course Syllabus Fourth Edition, Copyright 2009, American Academy of Family Physicians

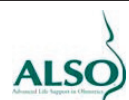

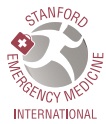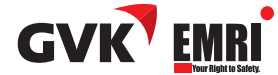

## PREECLAMPSIA/ECLAMPSIA

### Key points

- Preeclampsia and eclampsia can occur from the 20<sup>th</sup> week of pregnancy until 6 weeks after delivery
- Preeclampsia is a BP >140/90 on >2 readings >6 hours apart *AND* significant protein in the urine
- Severe preeclampsia signs/symptoms include altered mental status, blurred vision and persistent headache
- Eclampsia is preeclampsia with seizures
- Obtain past medical history: medications, last menstrual period, gestational age (trimester)
- Magnesium toxicity manifests as loss of deep tendon reflexes and respiratory depression

### Differential diagnosis

- Epilepsy
- Hypoglycemia
- Trauma/head injury
- Alcohol withdrawal
- Toxins/poisoning/overdose
- Chronic hypertension

### Serious signs and symptoms

- Hypoxia/cyanosis
- Shortness of breath
- Seizures
- Altered mental status

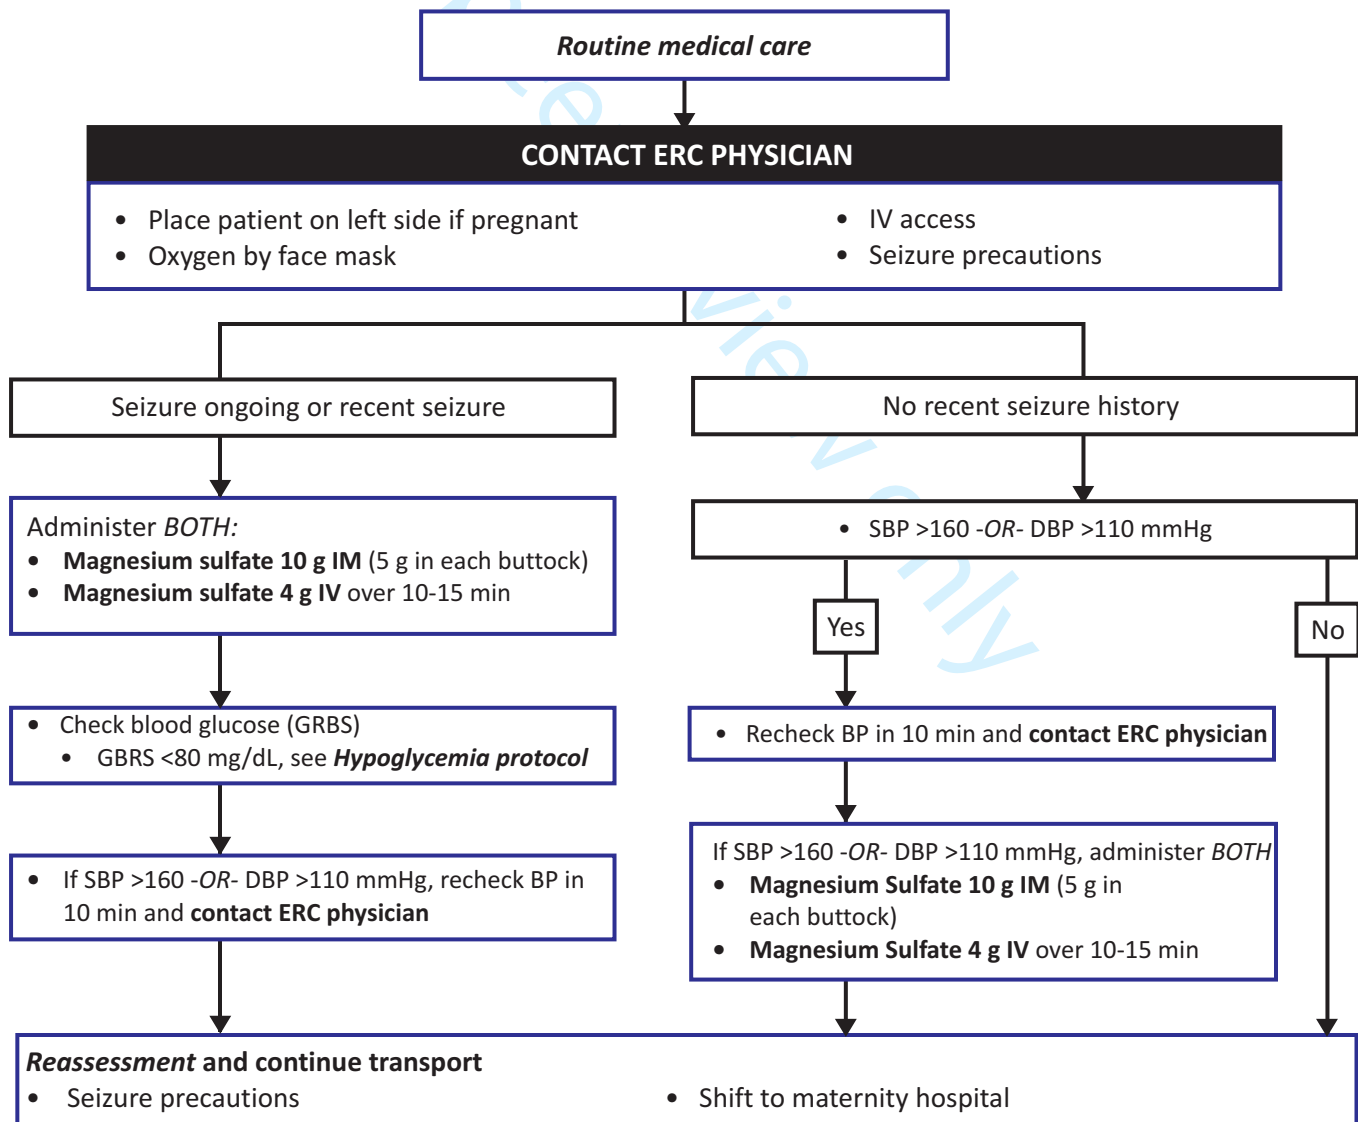



## ERC Physician

### Key points

- The definitive treatment for eclampsia is delivery
- Magnesium should not be used to control hypertension
- Epigastric pain may be a sign of severe preeclampsia (also consider gallbladder disease)

### Prehospital management options

- If repeat seizure occurs more than 10 minutes after the initial IV loading dose of magnesium, administer **Magnesium sulfate 2 g IV** over 10-15 minutes
- Respiratory depression may occur with magnesium toxicity
  - **Calcium gluconate 1 g IV** can be given for significant respiratory depression

### Prolonged transport or in hospital management options

- If the patient continues to seize after repeat magnesium administration, consider **Midazolam 2-4 mg IV/IM**; may repeat x 1 for ongoing seizure
  - Alternate medications:
    - **Diazepam 5 mg IV/IM**; may repeat x 1 for ongoing seizure
- Antihypertensive medications
  - Treat persistent SBP >160 or DBP >110 mmHg (Goal: SBP <160 and DBP <110 mmHg)
    - **Nifedipine 20 mg PO** (*DO NOT* give sublingual)
      - **Nifedipine 10 mg PO** may be repeated every 30 min to a max of 40 mg
    - Alternate medications:
      - **Labetalol 10 mg IV**
        - If BP remains elevated above goal after 10 min, then administer **Labetalol 20 mg IV** every 10 minutes as needed to a max of 110 mg
      - **Labetalol 200 mg PO**
        - If BP remains elevated above goal after 30 min, then administer **Labetalol 200 mg PO** x 1 additional dose

### How to mix and infuse Magnesium sulfate

- **Magnesium sulfate 4 g**: Mix 4 ampules of 50% MgSO<sub>4</sub> (1 g/ampule) in 100 mL NS
  - Infuse over 10 minutes, 100-150 drops per minute
- **Magnesium sulfate 2 g**: Mix 2 ampules of 50% MgSO<sub>4</sub> (1 g/ampule) in 100 mL NS
  - Infuse over 10 minutes, 100-150 drops per minute

Monitor the patients' vital signs, oxygen saturation, deep tendon reflexes, and level of consciousness every 15 minutes for the first hour, and every 30 minutes for the second hour.

Assess for signs of *magnesium toxicity* (e.g., visual changes, somnolence, flushing, muscle paralysis, loss of patellar reflexes) or pulmonary edema.

### References

- Advanced Life Support in Obstetrics (ALSO) Provider Course Syllabus Fourth Edition, Copyright 2009, American Academy of Family Physicians

STROBE Statement—Checklist of items that should be included in reports of *cohort studies*  
 Title: Reducing early infant mortality in India: results of a prospective cohort of pregnant women  
 utilizing emergency medical services

|                              | Item No | Recommendation                                                                                                                                                                                                                                                                   |
|------------------------------|---------|----------------------------------------------------------------------------------------------------------------------------------------------------------------------------------------------------------------------------------------------------------------------------------|
| <b>Title and abstract</b>    | 1       | (a) Indicate the study's design with a commonly used term in the title or the abstract<br>Title page<br>(b) Provide in the abstract an informative and balanced summary of what was done and what was found<br>Page 2, line 1                                                    |
| <b>Introduction</b>          |         |                                                                                                                                                                                                                                                                                  |
| Background/rationale         | 2       | Explain the scientific background and rationale for the investigation being reported<br>Page 4, line 1                                                                                                                                                                           |
| Objectives                   | 3       | State specific objectives, including any prespecified hypotheses<br>Page 5, line 1                                                                                                                                                                                               |
| <b>Methods</b>               |         |                                                                                                                                                                                                                                                                                  |
| Study design                 | 4       | Present key elements of study design early in the paper<br>Page 5, line 11                                                                                                                                                                                                       |
| Setting                      | 5       | Describe the setting, locations, and relevant dates, including periods of recruitment, exposure, follow-up, and data collection<br>Page 5, line 11-15                                                                                                                            |
| Participants                 | 6       | (a) Give the eligibility criteria, and the sources and methods of selection of participants. Describe methods of follow-up<br>Enrollment: Page, line 18. Follow-up: Page 7, line 22<br>(b) For matched studies, give matching criteria and number of exposed and unexposed<br>NA |
| Variables                    | 7       | Clearly define all outcomes, exposures, predictors, potential confounders, and effect modifiers. Give diagnostic criteria, if applicable<br>Page 7, line 5                                                                                                                       |
| Data sources/<br>measurement | 8*      | For each variable of interest, give sources of data and details of methods of assessment (measurement). Describe comparability of assessment methods if there is more than one group<br>Page 7, line 5-16                                                                        |
| Bias                         | 9       | Describe any efforts to address potential sources of bias<br>Page 6, line 18                                                                                                                                                                                                     |
| Study size                   | 10      | Explain how the study size was arrived at<br>NA                                                                                                                                                                                                                                  |
| Quantitative variables       | 11      | Explain how quantitative variables were handled in the analyses. If applicable, describe which groupings were chosen and why<br>Page 8, line 11                                                                                                                                  |
| Statistical methods          | 12      | (a) Describe all statistical methods, including those used to control for confounding<br>Page 8, line 19<br>(b) Describe any methods used to examine subgroups and interactions<br>Page 9, line 2<br>(c) Explain how missing data were addressed                                 |

(e) Describe any sensitivity analyses

---

## Results

---

|                          |     |                                                                                                                                                                                                                                 |
|--------------------------|-----|---------------------------------------------------------------------------------------------------------------------------------------------------------------------------------------------------------------------------------|
| Participants             | 13* | (a) Report numbers of individuals at each stage of study—eg numbers potentially eligible, examined for eligibility, confirmed eligible, included in the study, completing follow-up, and analysed<br>Page 12, line 20           |
|                          |     | (b) Give reasons for non-participation at each stage<br>Page 12, line 20                                                                                                                                                        |
|                          |     | (c) Consider use of a flow diagram<br>NA                                                                                                                                                                                        |
| Descriptive data         | 14* | (a) Give characteristics of study participants (eg demographic, clinical, social) and information on exposures and potential confounders<br>Page 10, line 2                                                                     |
|                          |     | (b) Indicate number of participants with missing data for each variable of interest                                                                                                                                             |
|                          |     | (c) Summarise follow-up time (eg, average and total amount)<br>Page 12, line 20                                                                                                                                                 |
| Outcome data             | 15* | Report numbers of outcome events or summary measures over time                                                                                                                                                                  |
| Main results             | 16  | (a) Give unadjusted estimates and, if applicable, confounder-adjusted estimates and their precision (eg, 95% confidence interval). Make clear which confounders were adjusted for and why they were included<br>Page 13, line 9 |
|                          |     | (b) Report category boundaries when continuous variables were categorized<br>NA                                                                                                                                                 |
|                          |     | (c) If relevant, consider translating estimates of relative risk into absolute risk for a meaningful time period<br>NA                                                                                                          |
| Other analyses           | 17  | Report other analyses done—eg analyses of subgroups and interactions, and sensitivity analyses<br>Page 14, line 19                                                                                                              |
| <b>Discussion</b>        |     |                                                                                                                                                                                                                                 |
| Key results              | 18  | Summarise key results with reference to study objectives<br>Page 15, line 25                                                                                                                                                    |
| Limitations              | 19  | Discuss limitations of the study, taking into account sources of potential bias or imprecision. Discuss both direction and magnitude of any potential bias<br>Page 19, line 7                                                   |
| Interpretation           | 20  | Give a cautious overall interpretation of results considering objectives, limitations, multiplicity of analyses, results from similar studies, and other relevant evidence<br>Page 17, line 4                                   |
| Generalisability         | 21  | Discuss the generalisability (external validity) of the study results<br>Page 3, line 11                                                                                                                                        |
| <b>Other information</b> |     |                                                                                                                                                                                                                                 |
| Funding                  | 22  | Give the source of funding and the role of the funders for the present study and, if applicable, for the original study on which the present article is based<br>Page 20, line 6                                                |

1 **Note:** An Explanation and Elaboration article discusses each checklist item and gives methodological background and  
2 published examples of transparent reporting. The STROBE checklist is best used in conjunction with this article (freely  
3 available on the Web sites of PLoS Medicine at <http://www.plosmedicine.org/>, Annals of Internal Medicine at  
4 <http://www.annals.org/>, and Epidemiology at <http://www.epidem.com/>). Information on the STROBE Initiative is  
5 available at <http://www.strobe-statement.org>.  
6  
7  
8  
9  
10  
11  
12  
13  
14  
15  
16  
17  
18  
19  
20  
21  
22  
23  
24  
25  
26  
27  
28  
29  
30  
31  
32  
33  
34  
35  
36  
37  
38  
39  
40  
41  
42  
43  
44  
45  
46  
47  
48  
49  
50  
51  
52  
53  
54  
55  
56  
57  
58  
59  
60

For peer review only
